# Supplementary material
Source: PubMed Central journal article supplement (PMC3799897)
Supplement: NIHMS516622-supplement-Suporting_Information.pdf [file NIHMS516622-supplement-Suporting_Information.pdf]

**Follow the Leader:**

**the Use of Leader Peptides to Guide Natural Product Biosynthesis**

**Supplementary Information**

Trent J. Oman and Wilfred A. van der Donk\*

Department of Chemistry, Howard Hughes Medical Institute, and Institute for Genomic Biology.  
University of Illinois at Urbana-Champaign, Urbana, IL 61801, USA.

Telephone: 217 244 5360; e-mail: vddonk@illinois.edu

**Nomenclature used in the literature for the classes of compounds discussed in relation to the nomenclature used in this review.**

Historically, proteins and peptides that are generated in an inactive form and then proteolytically processed are called proproteins or propeptides. Similarly, peptides that contain a localization signal peptide (to an organelle or for secretion in unicellular organisms) are called prepeptides or preproteins. Peptides that have localization sequences and additional other sequences that do not end up in the final products are called prepropeptides. Unfortunately, in the field of posttranslationally modified peptide natural products where the modifications are not just proteolytic processes, the nomenclature used has been non-uniform between different classes of compounds and even within different classes of compounds. For instance, the term prepropeptide has also been used for the entire precursor including the segment that is transformed to the final structure (e.g. <sup>1,2</sup>). Similarly, the term propeptide has been used for the segment that does not end up in the final product (e.g. for microcins<sup>3,4</sup> and conopeptides<sup>5</sup>), or for the segment that does end up in the final product (e.g. for lantibiotics, mycotoxins, and cyclic bacteriocins <sup>1,2,6</sup>). Similarly, the name structural peptide has been used for the full precursor peptide<sup>1</sup> (as the translation product of the structural gene) as well as for the segment that ultimately forms the final product (e.g. <sup>7-9</sup>).

Because of this non-consistent use of terms and because it is not known for many of the natural products discussed in this review what the exact roles are for the segments that do not end up in the final product, we propose a standard uniform nomenclature and have used this throughout the review. We call the ribosomally synthesized peptides precursor peptides (we do not use prepeptides as this term has different meanings in the different fields). Any clear localization signals that direct the peptide to a certain organelle are referred to as signal peptides. The peptide sequence that is transformed into the final product is called core peptide (we do not use the terms propeptide or structural peptide because, again, these terms have different meaning in different fields), with the segment located N-terminal to the first core peptide termed leader peptide. For cases where the core peptide is flanked by conserved regions at both N- and C-terminus, we call these conserved sequences recognition sequences. The resulting nomenclature is shown in **Fig. 1** of the main text and also in **Supplementary Figure 1**. How these terms used in this review relate to the nomenclature used in each group of natural products discussed is also shown in **Supplementary Figure 1**.

**Supplementary Figure 1. Nomenclature for various segments of the precursor peptides used in this review in relation to nomenclature in the literature.**

| <u>Product Class</u>                    | <u>Terms used in literature</u>  | <u>Terms used in this review</u> |
|-----------------------------------------|----------------------------------|----------------------------------|
| <b>Lantibiotics</b> <sup>6</sup>        | prepeptide                       | precursor peptide                |
|                                         | leader peptide                   | leader peptide                   |
|                                         | structural peptide               | core peptide                     |
| <b>Microcins</b> <sup>3</sup>           | propeptide                       | core peptide                     |
|                                         | promicrocin <sup>3</sup>         | precursor peptide                |
|                                         | premicrocin <sup>10</sup>        | precursor peptide                |
| <b>Cytolysins</b> <sup>11</sup>         | propeptide                       | leader peptide                   |
|                                         | precursor peptide                | precursor peptide                |
|                                         | leader peptide                   | leader peptide                   |
| <b>Cyanobactins</b>                     | propeptide                       | core peptide                     |
|                                         | leader peptide                   | leader peptide                   |
|                                         | structural peptides              | core peptide                     |
|                                         | cassettes                        | core peptide                     |
| <b>Thiopeptides</b> <sup>1,12</sup>     | recognition sequences            | recognition sequences            |
|                                         | structural peptide <sup>1</sup>  | precursor peptide                |
|                                         | leader peptide                   | leader peptide                   |
|                                         | structural peptide <sup>12</sup> | core peptide                     |
|                                         | core peptide                     | core peptide                     |
| <b>Conopeptides</b> <sup>5</sup>        | N-terminal signal sequence       | signal peptide                   |
|                                         | propeptide                       | leader peptide                   |
|                                         | toxin region                     | core peptide                     |
|                                         | post-peptide                     | recognition sequence             |
| <b>Amatoxins and Phallotoxins</b>       |                                  |                                  |
| <b>Cyclotides</b> <sup>13</sup>         | propeptide                       | core peptide                     |
|                                         | propeptide/prosequence           | leader peptide                   |
|                                         | NTR (N-terminal repeats)         | recognition sequences            |
| <b>Microviridins</b> <sup>14,15</sup>   | prepeptide                       | precursor peptide                |
|                                         | leader peptide                   | leader peptide                   |
|                                         | core region                      | core peptide                     |
| <b>Cyclic bacteriocins</b> <sup>2</sup> | propeptide                       | core peptide                     |
|                                         | prepropeptide                    | precursor peptide                |
|                                         | prepeptide                       | core peptide                     |

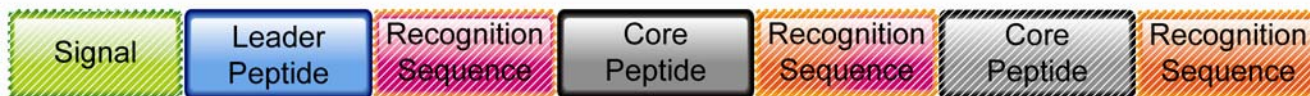

Peptide segments in striped boxes are not present in all examples of precursor peptides discussed in this review.

Sequence data for **Supplementary Figures 2-12** was obtained from the NCBI Database (<http://www.ncbi.nlm.nih.gov/>). The name of the precursor peptide and accession number for each sequence is indicated to the left of the alignment. Alignments were generated using AlignX software (Vector NTI, Invitrogen). Sequence Logos<sup>16</sup> were created using WebLogo software (internet version 3)<sup>17</sup>.

**Importantly, these alignments are not meant to be comprehensive, but to reveal commonalities, differences, and general topology of the precursor peptides.**

**Supplementary Figure 2. Sequence alignments of the precursor peptides for selected class I lantibiotics.** The logo below the alignments shows the probability of each amino acid (height of the letter) and is scaled (width of the letter) according to how many sequences contributed to that position (i.e. narrow letters were generated from a smaller number of sequences than wider letters). The blue line above sequence logo indicates leader peptide. An FXLD motif is found at positions 22-25, and a Pro is often found in the P2 position.

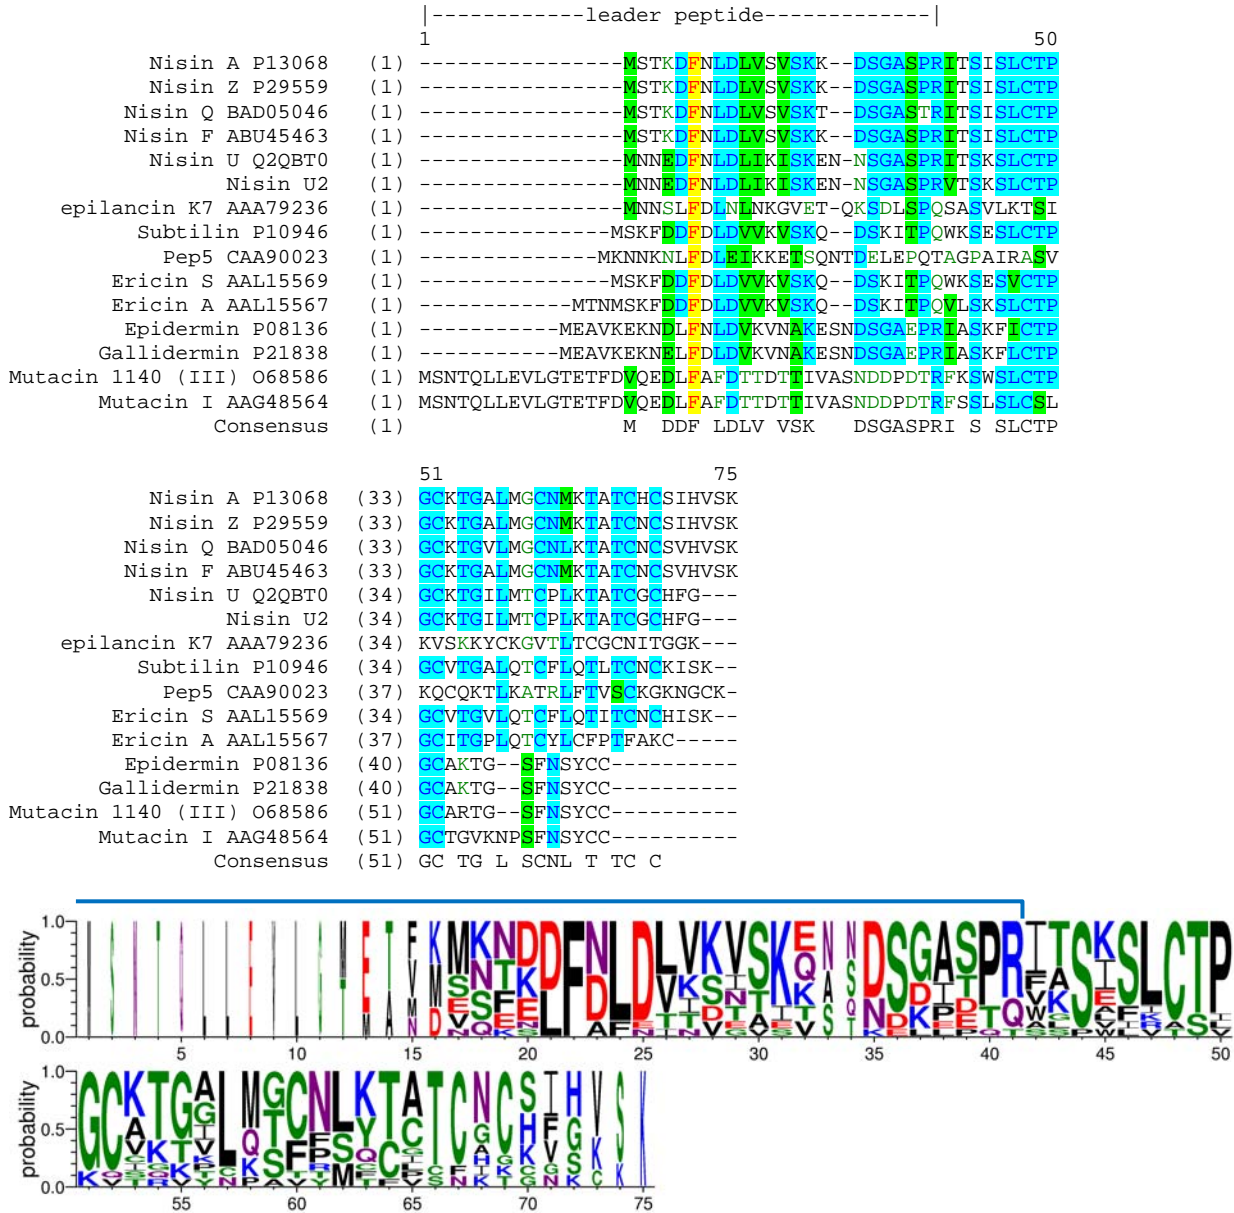

**Supplementary Figure 3. Sequence alignment of the precursor peptides of selected class II lantibiotics.** The logos show the probability of each amino acid (height of the letter) and are scaled (width of the letter) according to how many sequences contributed to that position (i.e. narrow letters were generated from a smaller number of sequences than wider letters). Blue lines above sequence logos indicate the leader peptide. The ELXXBXG motif is boxed in grey and the double Gly motifs are boxed in green (Note the first Gly in the double Gly motif is the last Gly in the ELXXBXG motif). In non-lantibiotic bacteriocins, this motif is E(L/B)XXBXG (see **Supplementary Fig. 4**). The motif is not found in two-peptide lantibiotics.

**a. Single peptide lantibiotics**

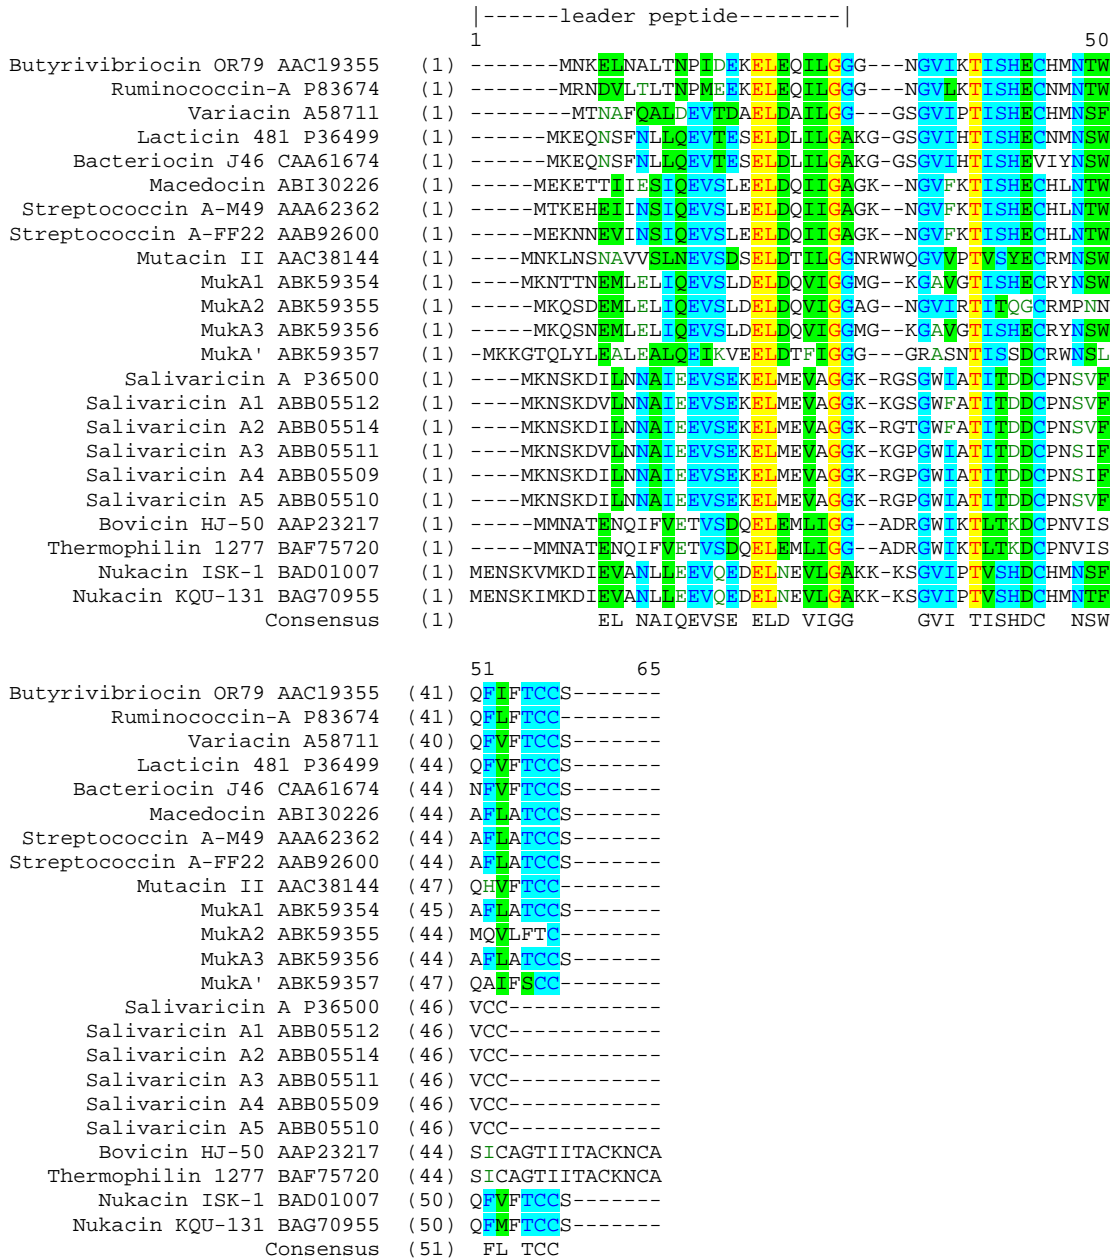

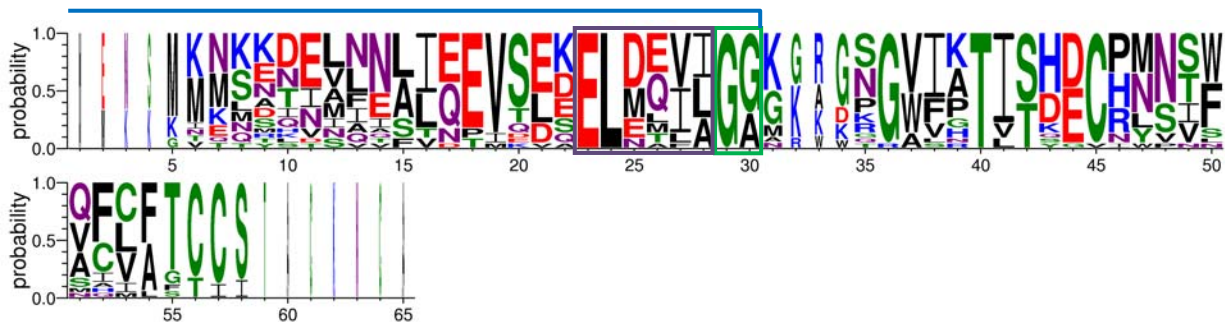

**b. Two-peptide lantibiotics:  $\alpha$  peptides**

|                                   |     |                                                          |    |
|-----------------------------------|-----|----------------------------------------------------------|----|
|                                   |     | -----leader peptide-----                                 |    |
|                                   | 1   |                                                          | 50 |
| Lacticin 3147 alpha O87236        | (1) | -----MNKNEIETQPVTWLEVSDQNFDEDVFGACSTN-TF                 |    |
| Plantaracin W alpha AAG02567      | (1) | -----MKISKIEAQARKDFFKKIDTNSNLNNGAKCK--WN                 |    |
| BHT alpha AAZ76603                | (1) | -----MKEIQKAGLQEELSI LMDPANNLQLTAGIGTTVVN--S             |    |
| Staphylococcin C55 alpha BAB78438 | (1) | -----MKSSFLEKDIEEQVTFWEVYSEQFDDDFGACSTN-TF               |    |
| Smb alpha BAD72776                | (1) | -----MKSNI LKINNVTEMEKNMVTLLKDEDM LAGGSTPACAIG--         |    |
| Hal alpha BAB04173                | (1) | --MTNLLKEWKMP LERTHNSNPAGDI FQELLEDQDI LAGVNGACAW---Y    |    |
| Lichenicidin alpha YP_093633      | (1) | MSKKEMILSWKNP LVRTESSYHPAGN L LKELQEE LQHSIAG L TITLSTCA |    |
| Consensus                         | (1) | L IL EI DQE L V GA F                                     |    |

|                                   |      |                             |    |
|-----------------------------------|------|-----------------------------|----|
|                                   | 51   |                             | 74 |
| Lacticin 3147 alpha O87236        | (36) | SLSDYWGNN GAW CTLT HECMAWCK |    |
| Plantaracin W alpha AAG02567      | (36) | NLSCDLGNGH VCTLSHECQVSCN    |    |
| BHT alpha AAZ76603                | (38) | TFSIVLGNGGYI CTVTVECMRNCO   |    |
| Staphylococcin C55 alpha BAB78438 | (39) | SLSDYWGNGKGNWCTATHECM SWCK  |    |
| Smb alpha BAD72776                | (40) | VVGITVAVTGIS TACTSRCLNK--   |    |
| Hal alpha BAB04173                | (46) | NLSCRLGNGGAYCTLTVECM PSCN   |    |
| Lichenicidin alpha YP_093633      | (51) | ILSKPLGNGYLCTVTKECM PSCN    |    |
| Consensus                         | (51) | LS LGN G CTLT ECM CN        |    |

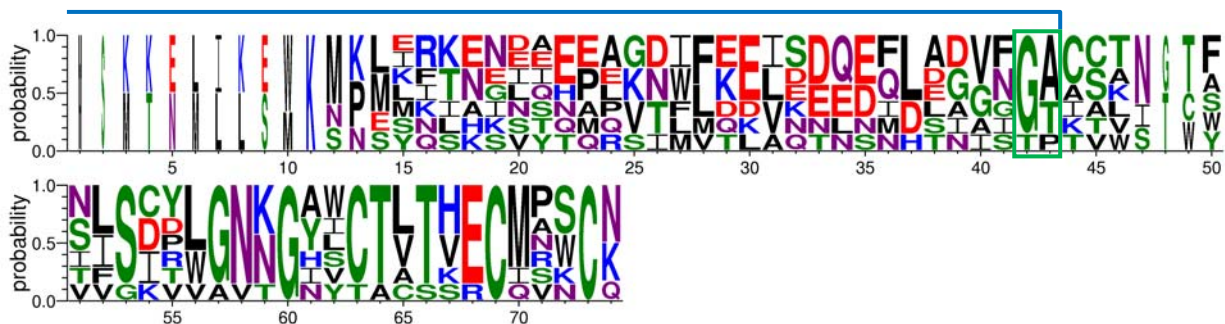



**c. Two-peptide lantibiotics:  $\beta$  peptides**

|                                  |      |                                                        |    |
|----------------------------------|------|--------------------------------------------------------|----|
|                                  |      | -----leader peptide-----                               |    |
|                                  |      | 1                                                      | 50 |
| Lacticin 3147 beta O87237        | (1)  | ---MKEKNMKNDTIELQGGKYLEDDMIELAEAGDESHGGTTPAIP--AIS     |    |
| Plantaricin W beta AAG02566      | (1)  | --MTKTSR----RKNAIANYLEPVDEKSNESFCAGDPEARSIGIPCTIG      |    |
| BHT beta AAZ76602                | (1)  | ---MKNLLKINNVTVEKDMVTLTKDEDMELAGSSTPACAIIGVVGITVA      |    |
| Staphylococcin C55 beta BAB78439 | (1)  | ---MKNELGKFLFLENLELGGKFSBSDMLEITDDEVYAGTPLALLGGAAT     |    |
| Smb beta BAD72777                | (1)  | ----MKEIQKAGLQEFELSLIMDDANNLEQLTAGICTIVVNSFTSIVLGNK    |    |
| Hal beta BAB04172                | (1)  | MVNSKDLRNP-EFRKAQGLQFVDEVNEKEELSSLAGSGDVHAQITWPCATV    |    |
| Lichenicidin beta                | (1)  | MKTMKNSAAREAFKGG--ANHPAGMVSEEEELKALVCGNDVNPETTPATSS    |    |
| Cytolysin L-AL AAK67264          | (1)  | -----MENLSVVPSPFEEESVEEMEAIQSGSDVQAEITTPVCAVA          |    |
| Cytolysin L-AS AAK67265          | (1)  | MLNKENQENYYSNKLKLVGSPSFEELSLVEEMEAIQSGSDVQAEITTPACFTTI |    |
| Consensus                        | (1)  | K K EL L EEV LEEL A GSGDV A TT A                       |    |
|                                  |      | 51                                                     | 85 |
| Lacticin 3147 beta O87237        | (46) | ILSAYIST-----NTCPTTKCTRAC-----                         |    |
| Plantaricin W beta AAG02566      | (44) | AAVAAS-----IAVCPTTKCKSKRGKRKK                          |    |
| BHT beta AAZ76602                | (48) | VTG-----I-STACTSRCKINK--                               |    |
| Staphylococcin C55 beta BAB78439 | (48) | GVIGYISN-----QTCPTTACTRAC-----                         |    |
| Smb beta BAD72777                | (47) | G-----YICTVIVEMRNCKSK---                               |    |
| Hal beta BAB04172                | (50) | CVS-----VALCPTTKCTRSQ-----                             |    |
| Lichenicidin beta                | (49) | WTCITAGVTV-----SASLCPTTKCTSRCK-----                    |    |
| Cytolysin L-AL AAK67264          | (39) | ATAAASSAACGWVGGGIFTGVTVVVSLLKHC-----                   |    |
| Cytolysin L-AS AAK67265          | (51) | GLG-----VGFALFSAKFC-----                               |    |
| Consensus                        | (51) | G CPTT CTK C                                           |    |

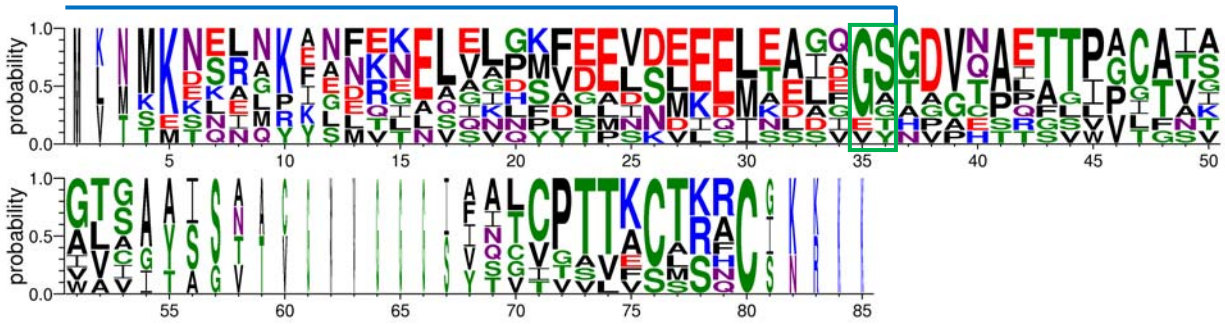

**Supplementary Figure 4. Sequence alignments of the precursor peptides of selected bacteriocins that do not undergo posttranslational modifications.** The logos below the alignments show the probability of each amino acid (height of the letter) and are scaled (width of the letter) according to how many sequences contributed to that position. Blue lines above the sequence logo indicate the leader peptide. The double Gly motif is boxed in green. While not as strongly conserved as in the class II lantibiotic precursor peptides (**Supplementary Fig. 3**), an E(B/M)XXBXG motif (with the G the first residue of the double Gly motif) is found in many leader peptides (see logo and individual peptides, e.g. curvacin for class IIa; lactacin F  $\beta$  for class IIb, and carnebacteriocin for class IIc).

**a. Class IIa bacteriocins**

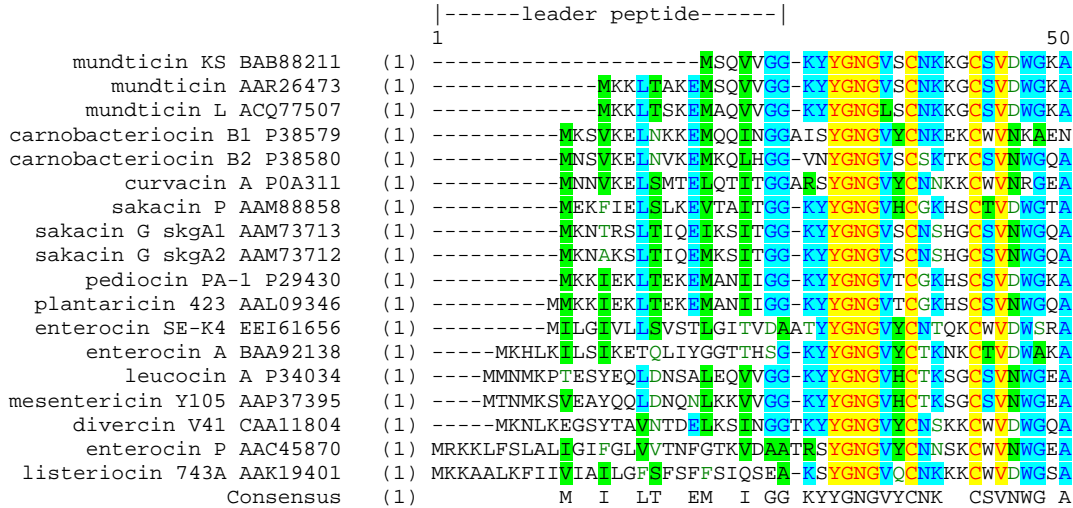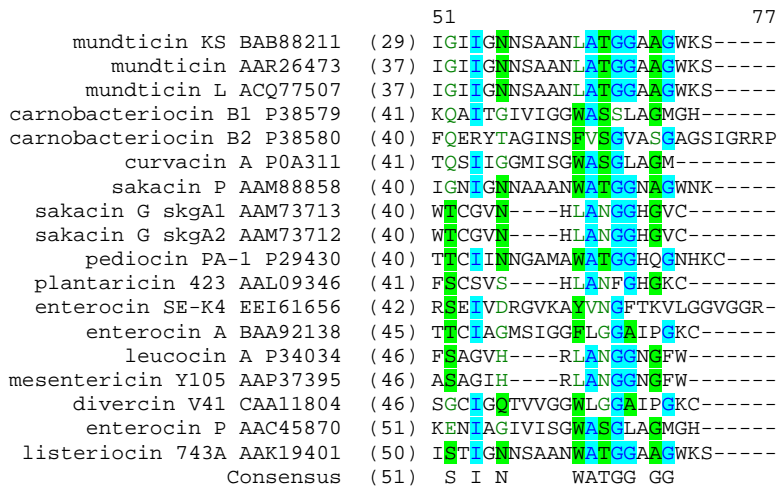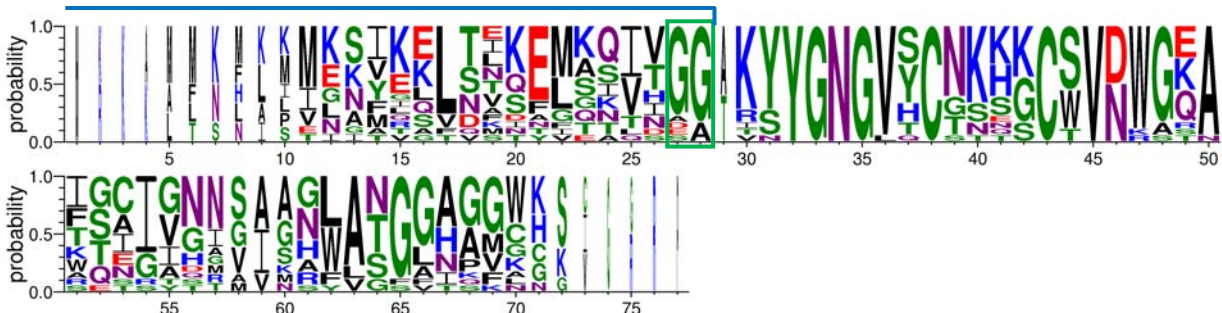



**b. Class IIb bacteriocins (two-peptide )**

```

|-----leader peptide-----|
1                                     50
Lactacin F alpha NP_964622 (1) -----MKQFNYSKDLAVVVGGR--NNWQTNVCGAVGSMIC
Lactacin F beta NP_964623 (1) -----MKLNDKELSKIVGGRNRWGDVLSAASGACTGKA
  brochocin C A AAC95138 (1) -----MHKVKLNNOELQQIVGGYSSKDCLKDTERKICAGTVA
  brochocin C B AAC95139 (1) -----MKKELLNKNEMSRITGGKIN---WGNVCGSCVGCAGVI
  plantaricin E CAA64188 (1) -----MLQFEKLOVSRLPQKLAKISGGFN--RGGYNFCKSVRHVVDA
  plantaricin F CAA64187 (1) -----MKKFLVLRDRRLNATSGG-----VFHAYSARQVRNRY
  plantaricin J CAA64198 (1) MTVNKMIKDLVDVDAFAPISNNKLNQVGGGAWKNFWSSLRKGFYDEAGC
  plantaricin K CAA64197 (1) -----MKIKLTVINEFEEITADAENKISGRRSRKNGIGYAIQYAFQAVE
  Consensus (1) M F L KELA IVGG VG G G G VA

```

```

51                                     89
Lactacin F alpha NP_964622 (37) ATVGGTICGPACAVAGAHYLPILWTAVTAATGGFGKIRK
Lactacin F beta NP_964623 (35) CKSFCPWGMATCGVGAAGGYFGYTHN-----
  brochocin C A AAC95138 (39) GAAGGGLAAGLGAIPCAFVCAHFGVIGGSAACIGLLGN
  brochocin C B AAC95139 (35) GGALGGLGGAGGCITGAIQSIWDQW-----
  plantaricin E CAA64188 (42) IGSVAGTRGIIKSLR-----
  plantaricin F CAA64187 (33) KSAVGPADWVLSAVRCFIHG-----
  plantaricin J CAA64198 (51) RAIIR-----
  plantaricin K CAA64197 (46) RAVLGGSRDYNK-----
  Consensus (51) AALGGI G I AV GA G

```

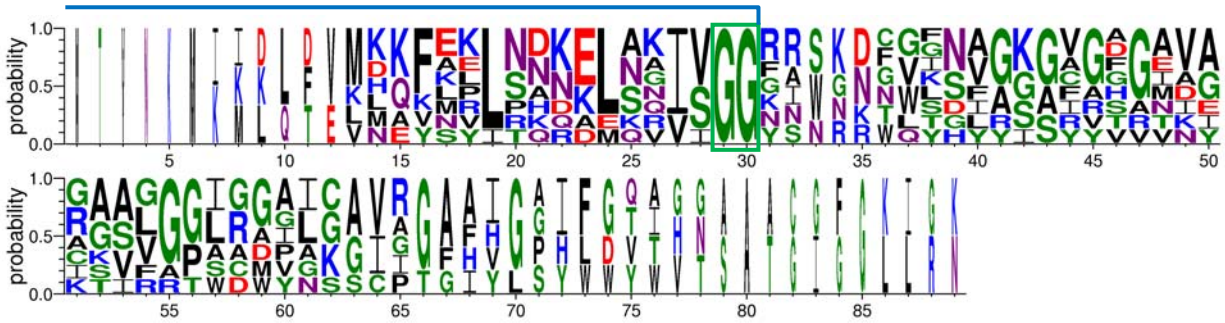

*c. Class IId bacteriocins*

```

|---leader peptide---|
1                                     50
carnobacteriocin A P38578 (1) -----MNVKELSLIKEMQQVTGGDQ---MSDGVNYG-KGSSLSKGGARCG
enterocin B AAD28234 (1) -----MQNVKELSLTKEMKQIIGGEN---DHRMPNELNRPNNLSKGGARCG
acidocin 8912 Q48501 (1) ---MISSHQKTLTDKELALISGG-----KTHYPTNAWKS LKGFWESL
lactococcin A1 D49786 (1) --MKNQLNFEILSDEELQGINGG-----ISGTGKGLAAAMVSGAAMGGA
bovicin 255 AAG29818 (1) MNTKTFEFDVMTDEALSTVEGGGKGYCKPVYYAANGYSCRYENGEWGYV
Consensus (1) N K LSDKEL I GG R LSKGG G

```

```

51                                     80
carnobacteriocin A P38578 (42) LGIVGGLATIPSPPLGWLGAAGVINSCKM
enterocin B AAD28234 (43) ALIAGCLFGIPKCPPLAWAAGLANVYSKCN-
acidocin 8912 Q48501 (41) RYTDGF-----
lactococcin A1 D49786 (43) LGAFCCPVGAIMCAWCGAVGGAMKYSI---
bovicin 255 AAG29818 (51) VTKGAFQATTDVIANGWVSLGGYFGKP-
Consensus (51) IG GG G GW AG A Y

```

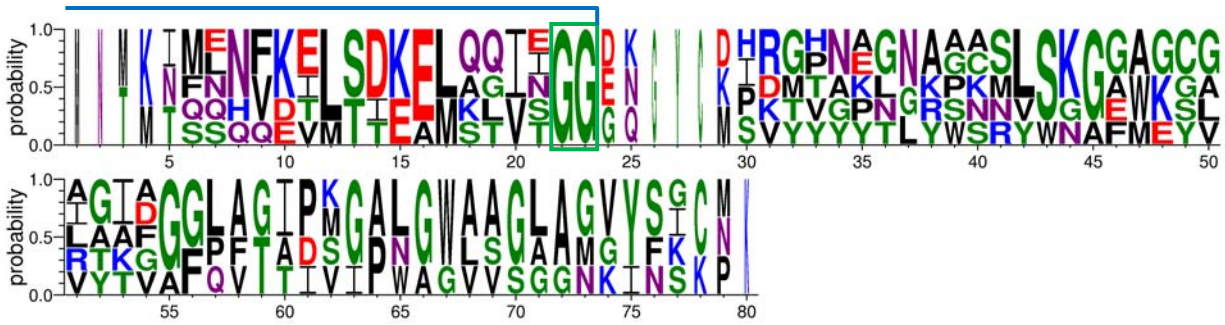

**Supplementary Figure 5a. Sequence alignment of putative precursor peptides of lasso peptide microcins.** The logo below the alignments shows the probability of each amino acid (height of the letter) and is scaled (width of the letter) according to how many sequences contributed to that position (i.e. narrow letters were generated from a smaller number of sequences than wider letters). Blue line above the sequence logo indicates leader peptide. For BURTA, BURPS/BURMA, SPHAL, see <sup>18</sup>.

**Lasso peptide microcins**

|                          |     |                                                  |    |
|--------------------------|-----|--------------------------------------------------|----|
|                          |     | -----leader peptide--(McjA)-----                 |    |
|                          |     | 1                                                | 50 |
| McjA Microcin J25 Q9X2V7 | (1) | MIKHFFHFNKLSSGKKNVPSPAKGVIQIKKSAQLTKGAGHVPEYFVGI |    |
| BURTA                    | (1) | -----MVRLLAKLLRSTIHGSHGVSLLAVSSTHGTGFGQTPD       |    |
| BURPS/BURMA              | (1) | -----MVRFLAKLLRSTIHGSHGVSLLAVSSTHGTGFGQTPD       |    |
| CAULO Q0LUL4             | (1) | -----MERLEDHIDDELIDLGAASVETQSDVLNAP--EPCI        |    |
| SPHAL                    | (1) | -----MKDFNELIDLGAISVETRGIEPLGPFVDEDQG            |    |
| Consensus                | (1) | V L LR I AVSLDT G P F                            |    |

|                          |      |               |    |
|--------------------------|------|---------------|----|
|                          |      | 51            | 63 |
| McjA Microcin J25 Q9X2V7 | (51) | GTPISFYG----  |    |
| BURTA                    | (38) | ARVISRFGFN--- |    |
| BURPS/BURMA              | (38) | ARVISRFGFN--- |    |
| CAULO Q0LUL4             | (35) | GREPTGLSRD--- |    |
| SPHAL                    | (32) | EHYTFAGITADD  |    |
| Consensus                | (51) | AR IS FG      |    |

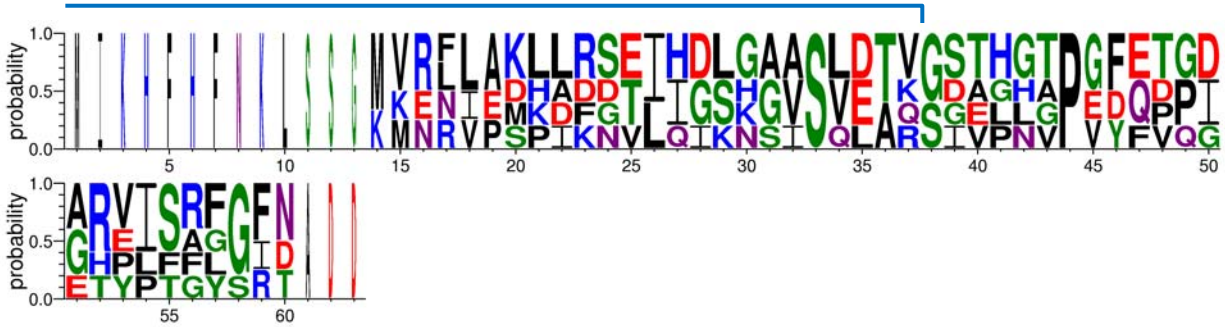

**Supplementary Figure 5b. Sequence alignment of the short precursor peptides of selected class II microcins.** The logo below the alignments shows the probability of each amino acid (height of the letter) and is scaled (width of the letter) according to how many sequences contributed to that position (i.e. narrow letters were generated from a smaller number of sequences than wider letters). Blue line above the sequence logo indicates leader peptide. The double Gly motif is boxed in green.

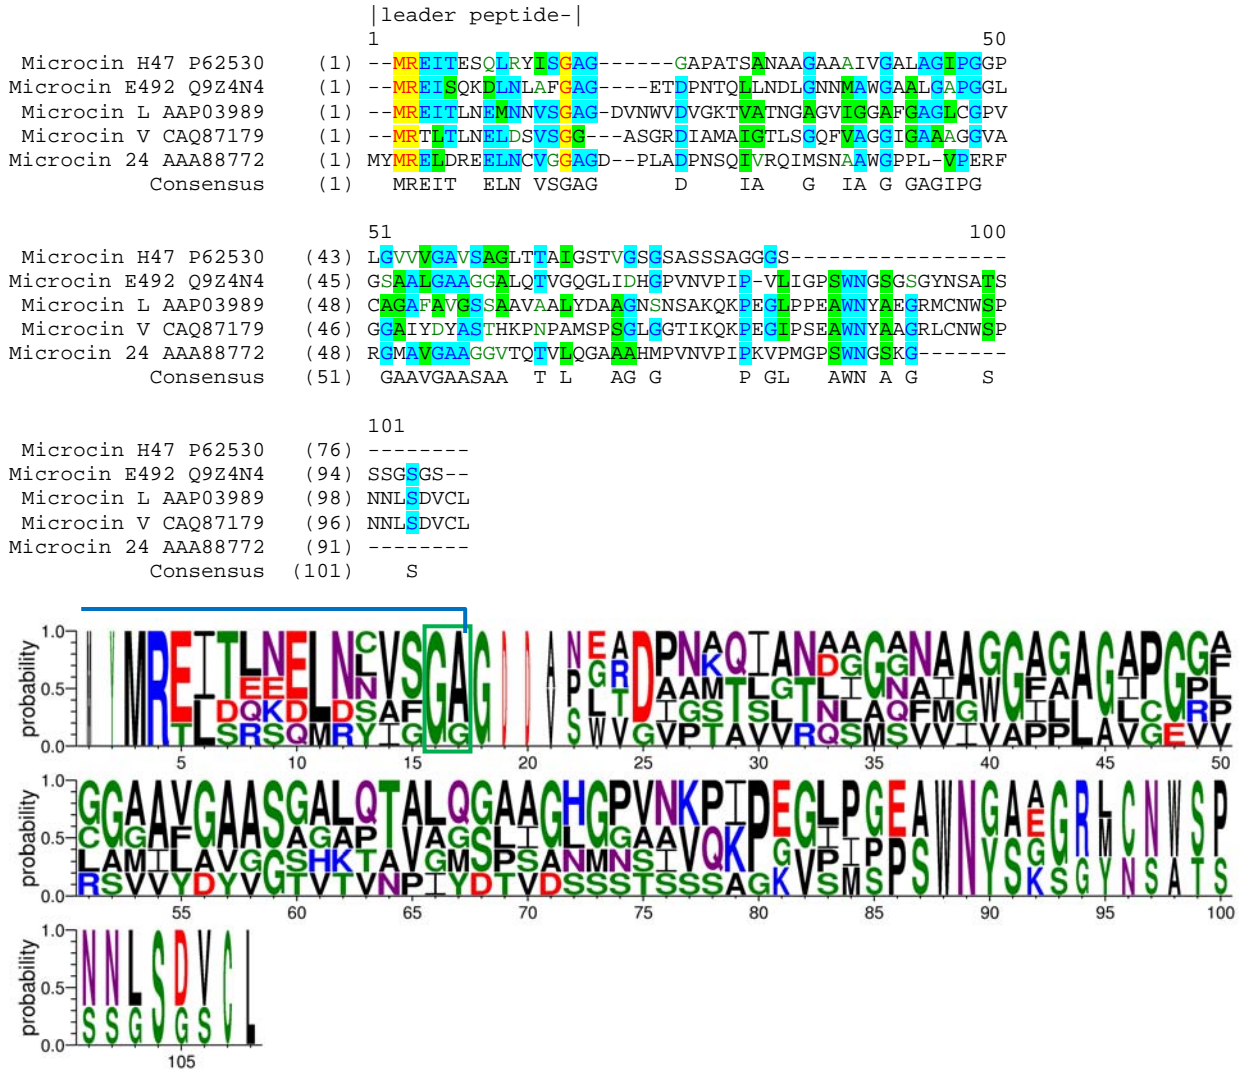

**Supplementary Figure 6. Sequence alignment of the precursor peptides of selected cytolysins.** The logo below the alignments shows the probability of each amino acid (height of the letter) and is scaled (width of the letter) according to how many sequences contributed to that position (i.e. narrow letters were generated from a smaller number of sequences than wider letters). Blue line above sequence logo indicates the leader peptide. The FXXXB and TQV motifs are boxed in grey, and the double Gly motif is boxed in green.

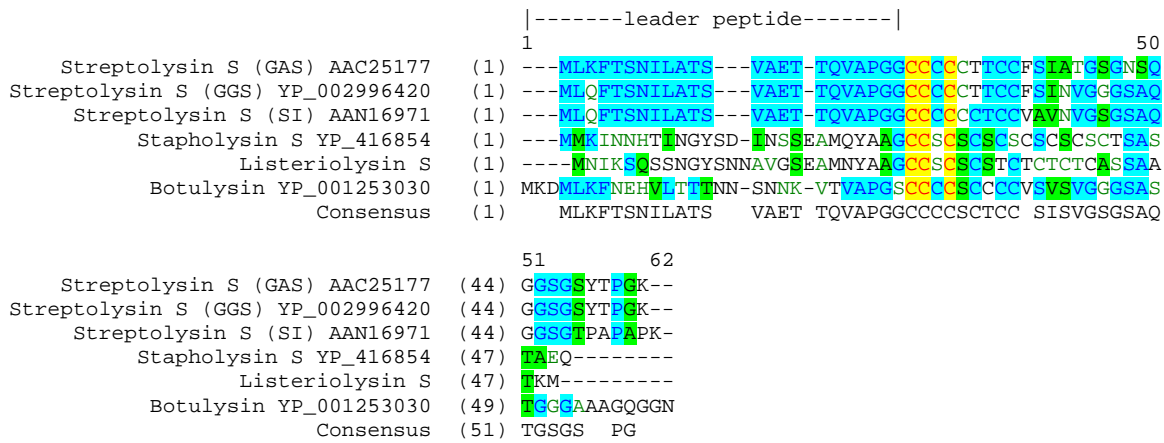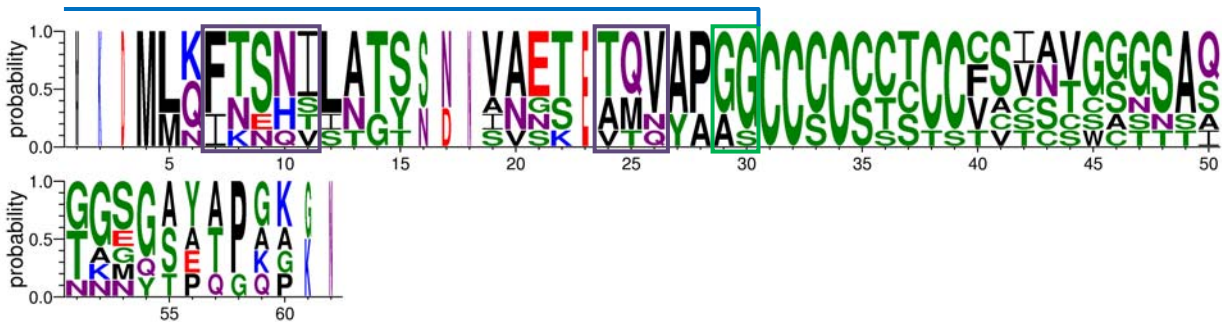



**Supplementary Figure 7. Sequence alignment of selected cyanobactin precursor peptides.** The logo below the alignments shows the probability of each amino acid (height of the letter) and is scaled (width of the letter) according to how many sequences contributed to that position (i.e. narrow letters were generated from a smaller number of sequences than wider letters). Blue line above sequence logo indicates leader peptide. Red line indicates recognition sequences. The hypervariable core peptides are located between the recognition sequences.

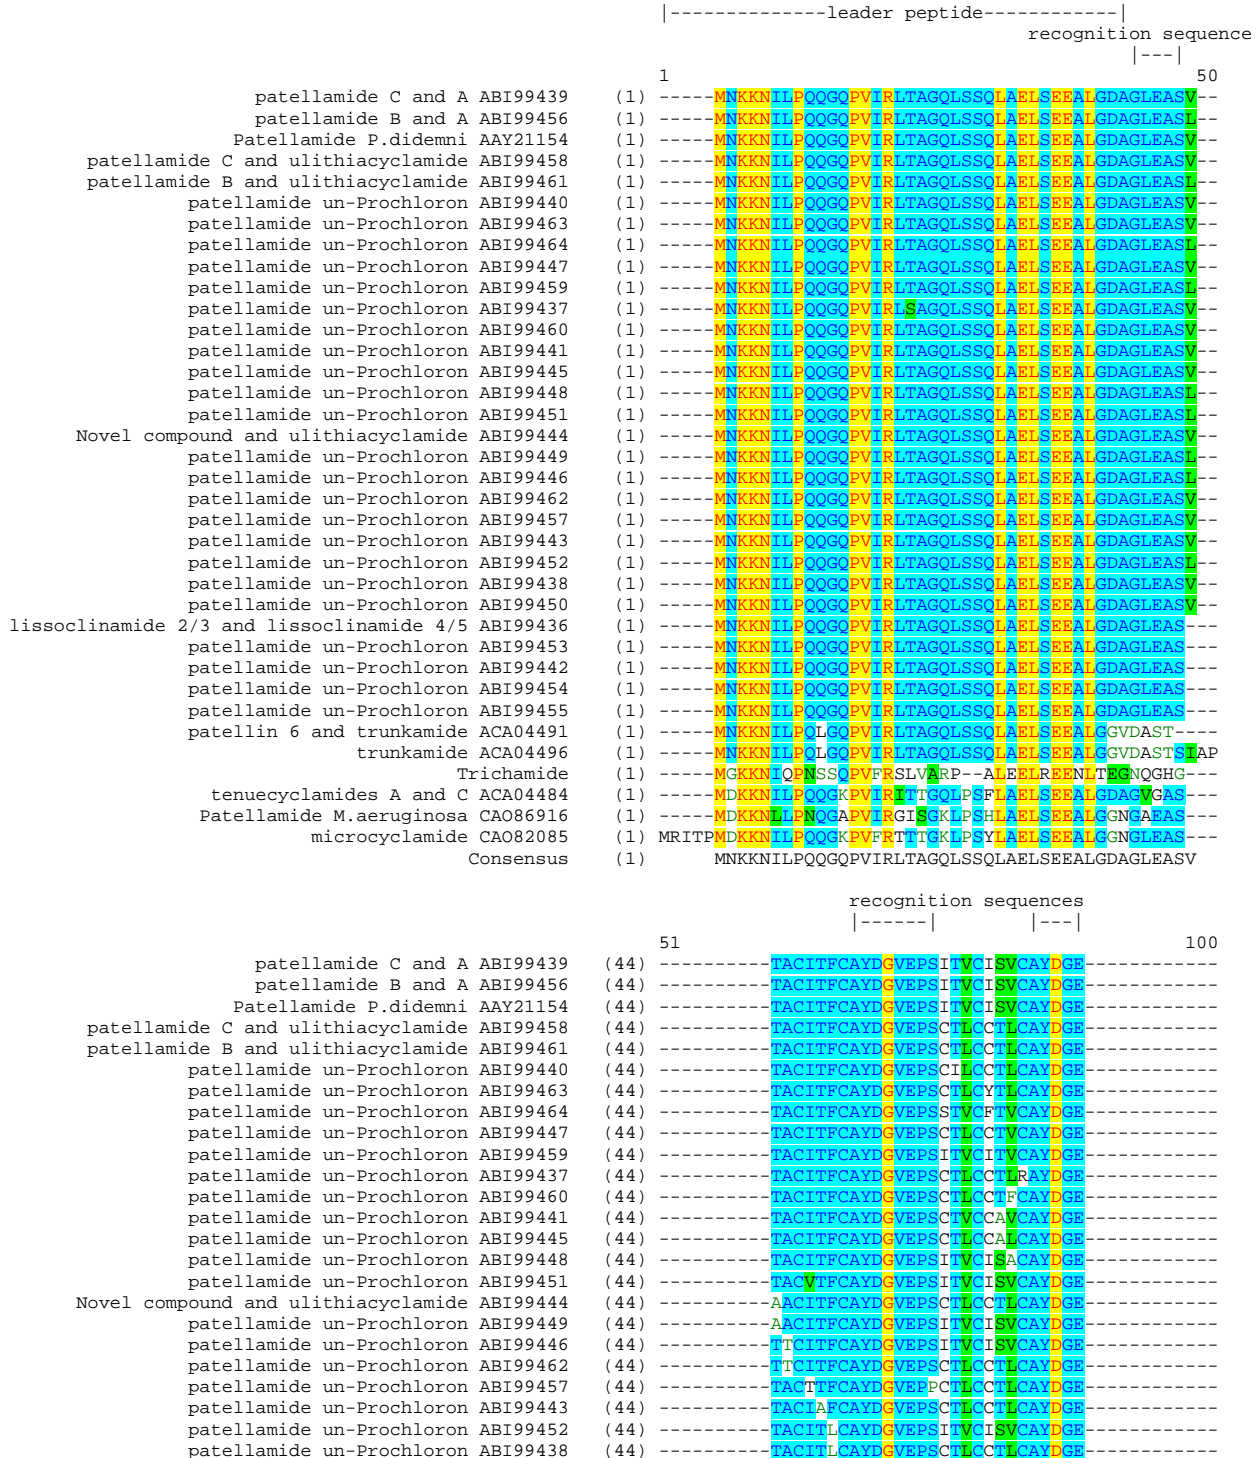



```

patellamide un-Prochloron ABI99450 (44) -----TACITFCAYDGVEPSCTLCCTVCAVDGE-----
lissoclinamide 2/3 and lissoclinamide 4/5 ABI99436 (43) -----ACFPITFCAYDGVEPS-FCFPTVCAVDGE-----
patellamide un-Prochloron ABI99453 (43) -----ACFPITFCAYDGVEPS-FCFPAVCAVDGE-----
patellamide un-Prochloron ABI99442 (43) -----ACFPITFCAYDGVEPS-LCFPTVCAVDGE-----
patellamide un-Prochloron ABI99454 (43) -----ACFPITFCAYDGVEPS-FCVPTVCAVDGE-----
patellamide un-Prochloron ABI99455 (43) -----ACFPITFCAYDGVEPS-FCLPTVCAVDGE-----
patellin 6 and trunkamide ACA04491 (42) -----LPVPTLCSYDGVDASTVPTLCSYDD-----
trunkamide ACA04496 (46) FCSYDGVDASTSIAPFCSYDGVDASTSIAPFCSYD-----
Trichamide (41) -----PLANGPSPGDLHPRLCSCSYDGDDE-----
tenuecyclamides A and C ACA04484 (43) -----ATGCMCAVDGAGAS--ATGCMCAVDGAGASATACACAYD*
Patellamide M.aeruginosa CA086916 (43) -----ATVSICAFDFGAEAS--FTGCMCAFDFGAEASITGCICAFD*
microcyclamide CA082085 (48) -----HCATFCAFDFGAEAS--HCATFCAFDFGAE-----
Consensus (51) TACITFCAYDGVEPS TLC TVCAVDGE

```

\* Tenuecyclamides A and C and patellamide from *M.aeruginosa* CA086916 have an additional C-terminal extension:

```

tenuecyclamides A and C ACA04484 (80) GAGASATACACAYE----
Patellamide M.aeruginosa CA086916 (80) GAEASITGCICAFDFGDEA

```

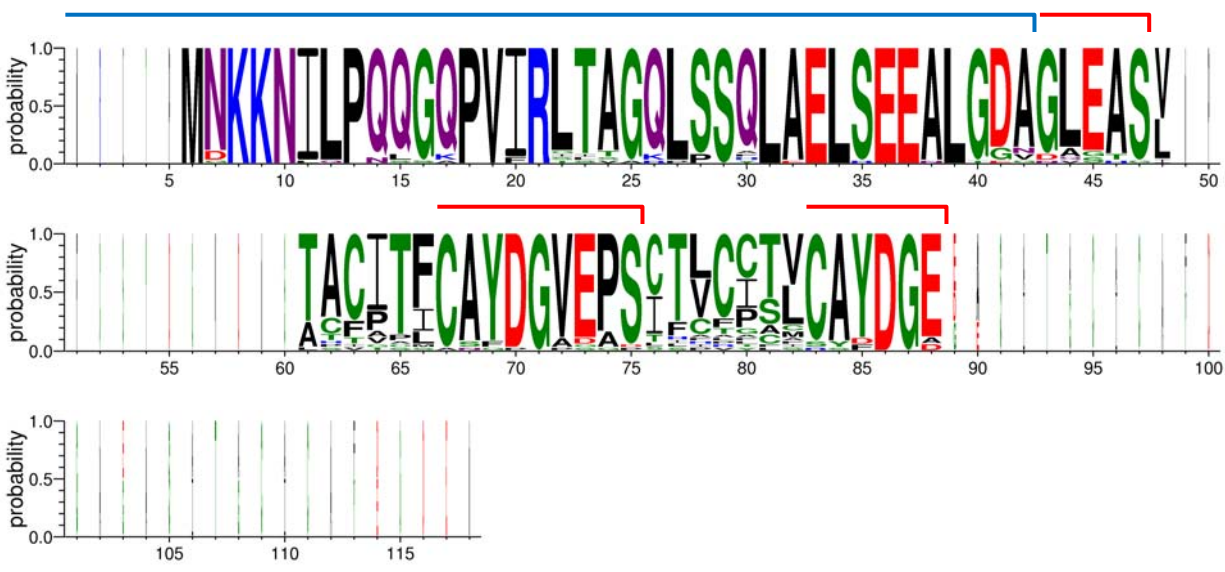

**NOTE:** The C-terminal stretches of narrow letters are due to the additional extensions in Tenuecyclamides A and C and a patellamide from *M. aeruginosa* CA086916.

**Supplementary Figure 8. Sequence alignment of selected precursor peptides of amatoxins and phallotoxins (mycotoxins).** The logo below each alignment shows the probability of each amino acid (height of the letter) and is scaled (width of the letter) according to how many sequences contributed to that position (i.e. narrow letters were generated from a smaller number of sequences than wider letters). Blue line above sequence logo indicates leader peptide. Red line indicates recognition sequences. The core peptides are located between the leader peptides and the recognition sequences. The amatoxins and phallotoxins contain highly conserved Pro residues at the protease cleavage sites. Both the leader peptide and recognition sequences are highly conserved, but the core peptides are hypervariable.

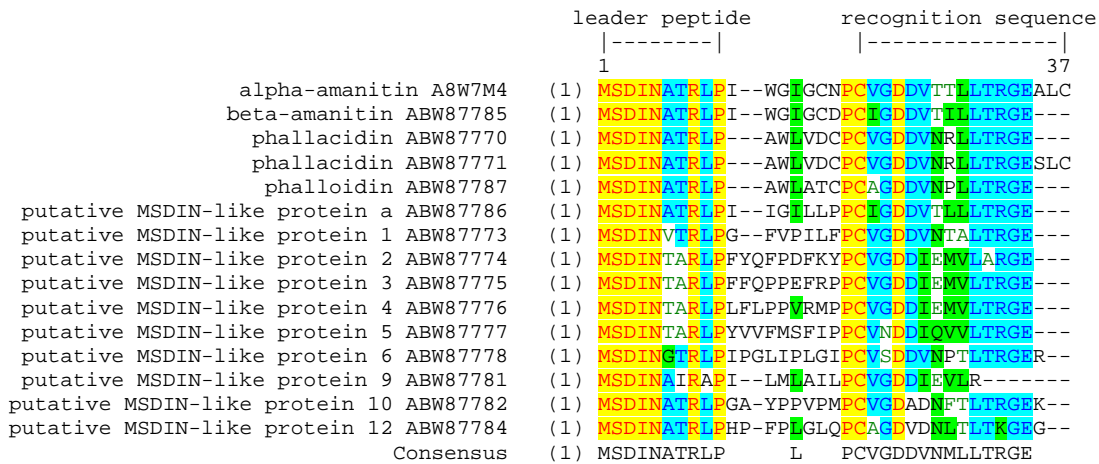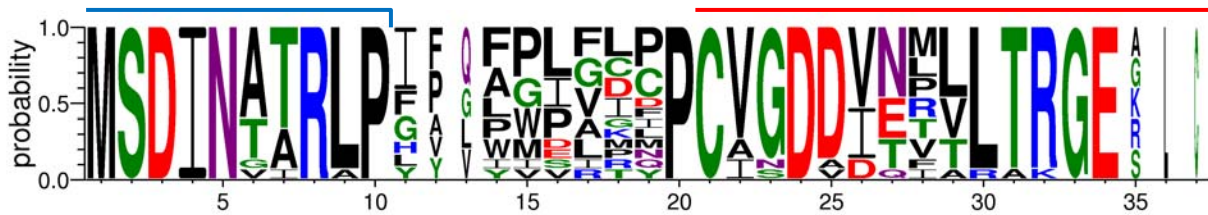

**Supplementary Figure 9. Sequence alignment of the precursor peptides of selected cyclotides.** The logo below the alignment shows the probability of each amino acid (height of the letter) and is scaled (width of the letter) according to how many sequences contributed to that position (i.e. narrow letters were generated from a smaller number of sequences than wider letters).

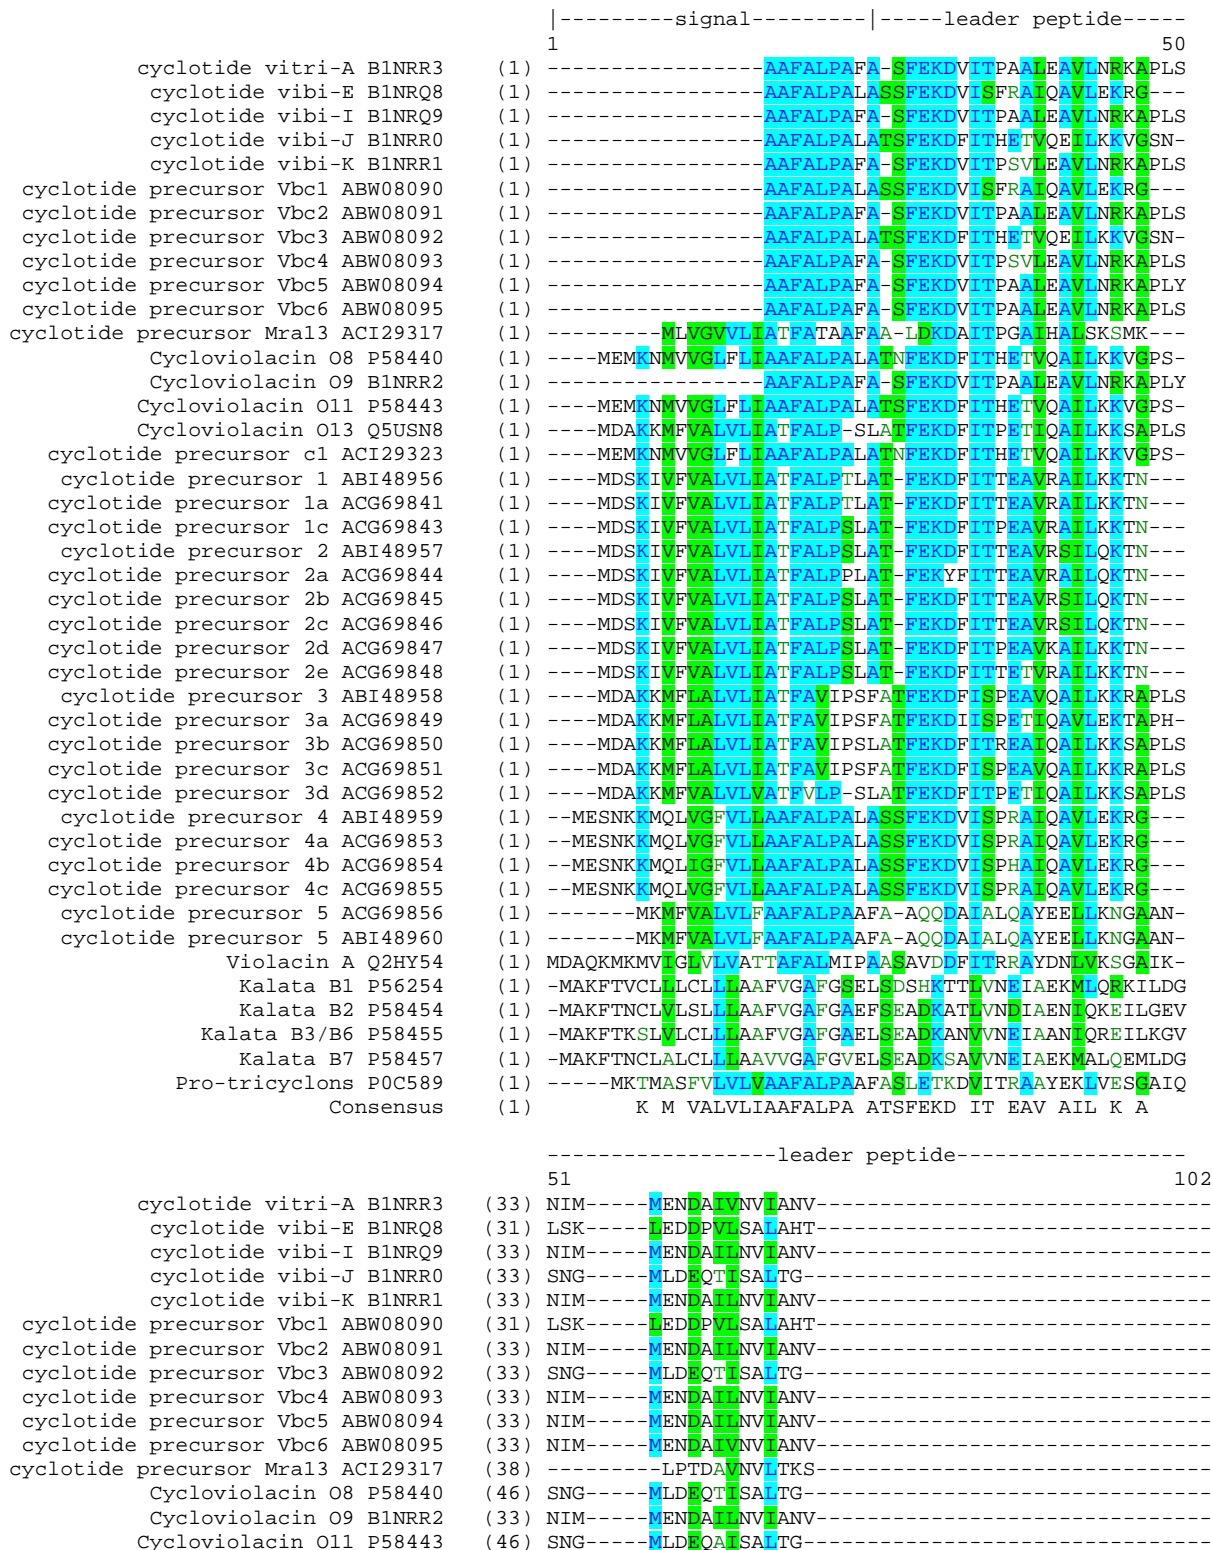

|                                 |      |           |                                                 |       |
|---------------------------------|------|-----------|-------------------------------------------------|-------|
| Cycloviolacin O13 Q5USN8        | (46) | NIM----   | EEEDVINALK-S                                    | ----- |
| cyclotide precursor c1 ACI29323 | (46) | SNG----   | MLDEQTIISALTG                                   | ----- |
| cyclotide precursor 1 ABI48956  | (43) | ANV----   | MPSQDVINALTG                                    | ----- |
| cyclotide precursor 1a ACG69841 | (43) | ANV----   | MPSQDVINALTG                                    | ----- |
| cyclotide precursor 1c ACG69843 | (43) | ANV----   | MPSQDVINALTG                                    | ----- |
| cyclotide precursor 2 ABI48957  | (43) | SNA----   | MPSQDVINALTG                                    | ----- |
| cyclotide precursor 2a ACG69844 | (43) | SNA----   | MPSQDVINALTG                                    | ----- |
| cyclotide precursor 2b ACG69845 | (43) | SNA----   | MPSQDVINALTG                                    | ----- |
| cyclotide precursor 2c ACG69846 | (43) | SNA----   | MPSQDVINALTG                                    | ----- |
| cyclotide precursor 2d ACG69847 | (43) | ANV----   | MPSQDVINALTG                                    | ----- |
| cyclotide precursor 2e ACG69848 | (43) | SNT----   | MPSQDVINALTG                                    | ----- |
| cyclotide precursor 3 ABI48958  | (47) | NIM----   | EEEDAMSAIK-S                                    | ----- |
| cyclotide precursor 3a ACG69849 | (46) | -----     | LKDAMNAIK-S                                     | ----- |
| cyclotide precursor 3b ACG69850 | (47) | NIM----   | EEEDVINALK-S                                    | ----- |
| cyclotide precursor 3c ACG69851 | (47) | NIM----   | EEEDAMSAIK-S                                    | ----- |
| cyclotide precursor 3d ACG69852 | (46) | NIM----   | EEEDVINALK-S                                    | ----- |
| cyclotide precursor 4 ABI48959  | (46) | LSK----   | LEDDPVLSAIART                                   | ----- |
| cyclotide precursor 4a ACG69853 | (46) | LSK----   | LEDDPVLSAIART                                   | ----- |
| cyclotide precursor 4b ACG69854 | (46) | FSK----   | LEDDPVLVAIART                                   | ----- |
| cyclotide precursor 4c ACG69855 | (46) | LSK----   | LEDDPVLSAIART                                   | ----- |
| cyclotide precursor 5 ACG69856  | (42) | -----     | -----GMT                                        | ----- |
| cyclotide precursor 5 ABI48960  | (42) | -----     | -----GMT                                        | ----- |
| Violacin A Q2HY54               | (50) | -----     | -----IPVMA                                      | ----- |
| Kalata B1 P56254                | (50) | VEATLVTDV | AEKMFIRKMKAE                                    | ----- |
| Kalata B2 P58454                | (50) | KTS----   | ETVLTMTFLEKMQLKGLPVCGETCFGGTCNTPGCSCT-WPICTRDS  | ----- |
| Kalata B3/B6 P58455             | (50) | KSS----   | ETTLTMTFLEKMQLKGLPTCGETCFGGTCNTPGCSCTSSWPICTRNG | ----- |
| Kalata B7 P58457                | (50) | VD----    | -----KLFIRKMK                                   | ----- |
| Pro-tricyclons POC589           | (46) | GITMTKTI  | ISNPITEEALVAHFNRKLGGGTIFDCGESCF LGTCYTKGCSC*    | ----- |
| Consensus                       | (51) |           | M D I I L                                       |       |

\*The procyclons POC589 have an unusually long leader peptide that contains the following additional intervening sequence appended where the asterisk is shown:

Pro-tricyclons POC589 (96) GEWKLCYGTNSLPESNNEKAMVASLEKDVITRAAYENLVNSGAIQGITMT

|                                    |      |                                                      |     |
|------------------------------------|------|------------------------------------------------------|-----|
|                                    |      | ----leader peptide-----                              |     |
|                                    | 101  |                                                      | 150 |
| cyclotide vitri-A B1NRR3           | (49) | KTVISNPVLEEALLKT---NHGVNG-IPCGESCQWIPCT---VTALIGCG   |     |
| cyclotide vibri-E B1NRQ8           | (47) | KTVISNPVLEEALLNG--ANLKAGNG-IPCAESCQWIPCT---VTALIGCG  |     |
| cyclotide vibri-I B1NRQ9           | (49) | KTVISNPVLEEALLKT---NHGVNG-IPCGESCQWIPCT---VTALIGCG   |     |
| cyclotide vibri-J B1NRR0           | (48) | KTVISNPVLEEALFKSSNSINALGGTFPCGESQWIPCT---TSKVIIGCA   |     |
| cyclotide vibri-K B1NRR1           | (49) | KTVISNPVLEEALLKT---NHGVNG-IPCGESCQWIPCT---VTALIGCG   |     |
| cyclotide precursor Vbc1 ABW08090  | (47) | KTVISNPVLEEALLNG--ANLKAGNG-IPCAESCQWIPCT---VTALIGCG  |     |
| cyclotide precursor Vbc2 ABW08091  | (49) | KTVISNPVLEEALLKT---NHGVNG-IPCGESCQWIPCT---VTALIGCG   |     |
| cyclotide precursor Vbc3 ABW08092  | (48) | KTVISNPVLEEALFKSSNSINALGGTFPCGESQWIPCT---TSKVIIGCA   |     |
| cyclotide precursor Vbc4 ABW08093  | (49) | KTVISNPVLEEALLKT---NHGVNG-IPCGESCQWIPCT---VTALIGCG   |     |
| cyclotide precursor Vbc5 ABW08094  | (49) | KTVISNPVLEEALLKT---NHGVNG-IPCGESCQWIPCT---VTALIGCG   |     |
| cyclotide precursor Vbc6 ABW08095  | (49) | KTVISNPVLEEALLKT---NHGVNG-IPCGESCQWIPCT---VTALIGCG   |     |
| cyclotide precursor Mra13 ACI29317 | (50) | KTIVSPTKLAEEFLND--ANDGVNG-IPCGESCQVYLPC---FTTIIIGCK  |     |
| Cycloviolacin O8 P58440            | (61) | KTVISNPVLEEALLTHSNSINALGGTIPCGESCQWIPCT---ISSVVGCS   |     |
| Cycloviolacin O9 B1NRR2            | (49) | KTVISNPVLEEALLKT---NHGVNG-IPCGESCQWIPCT---VTALIGCG   |     |
| Cycloviolacin O11 P58443           | (61) | KTVISNPVLEEALLTHSNSINALGGTIPCGESCQWIPCT---ISSVVGCS   |     |
| Cycloviolacin O13 Q5USN8           | (61) | KTVISNPVLEEAFLNK---SNGING-IPCGESCQWIPCT---ISSVVGCS   |     |
| cyclotide precursor c1 ACI29323    | (61) | KTVISNPVLEEALLTHSNSINALGGTIPCGESCQWIPCT---ISSVVGCS   |     |
| cyclotide precursor 1 ABI48956     | (58) | KTVISNPVLEETLVMK--LDNGLITG-IPCGESCQVYLPC---FTAPLIGCS |     |
| cyclotide precursor 1a ACG69841    | (58) | KTVISNPVLEETLVMK--LDNGLITG-IPCGESCQVYLPC---FTAPLIGCS |     |
| cyclotide precursor 1c ACG69843    | (58) | KTVISNPVLEEALLKN--LDNGLING-IPCGESCQWIPCT---VTAAIGCS  |     |
| cyclotide precursor 2 ABI48957     | (58) | KTLLSSVLEEALLKN--LDNGRNG-IPCGESCQWIPCT---VTAAIGCS    |     |
| cyclotide precursor 2a ACG69844    | (58) | KTLLSSVLEEALLKN--LDHGRNG-IPCGESCQWIPCT---VTAAIGCS    |     |
| cyclotide precursor 2b ACG69845    | (58) | KTLLSSVLEEALLKN--LDNGRNG-IPCGESCQWIPCT---VTAAIGCS    |     |
| cyclotide precursor 2c ACG69846    | (58) | KTLLSSVLEEALLKN--LDNGRNG-IPCGESCQWIPCT---VTAAIGCS    |     |
| cyclotide precursor 2d ACG69847    | (58) | KTLLSSVLEEALLKN--LDNGLING-IPCGESCQWIPCT---VTAAIGCS   |     |
| cyclotide precursor 2e ACG69848    | (58) | KTLLSSVLEEALLKN--LDNGLING-IPCGESCQWIPCT---VTAAIGCS   |     |
| cyclotide precursor 3 ABI48958     | (62) | KTVISNPVLEEALLKN---SNSLHG-IPCAESCQVYLPC---VTIVIGCS   |     |
| cyclotide precursor 3a ACG69849    | (57) | KTVISNPVLEEALLKN---SNGIKG-AGCIETCYTFPC---VTSEMIGCS   |     |
| cyclotide precursor 3b ACG69850    | (62) | KTVISNPVLEEALLKN---NNGING-IPCGESCQWIPCT---VTAAIGCS   |     |
| cyclotide precursor 3c ACG69851    | (62) | KTVISNPVLEEALLKN---SNSLHG-IPCAESCQVYLPC---VTIVIGCS   |     |
| cyclotide precursor 3d ACG69852    | (61) | KTVISNPVLEEAFLNK---SNGING-IPCGESCQWIPCT---VTAAIGCS   |     |
| cyclotide precursor 4 ABI48959     | (62) | KTVISNPVLEEALLNG--ANLKAGNG-IPCAESCQWIPCT---VTALIGCG  |     |
| cyclotide precursor 4a ACG69853    | (62) | KTVISNPVLEEALLNG--ANLKAGNG-IPCAESCQWIPCT---VTALIGCG  |     |
| cyclotide precursor 4b ACG69854    | (62) | KTVISNPVLEEALLNG--TNLKAGNG-IPCAESCQWIPCT---VTALIGCG  |     |
| cyclotide precursor 4c ACG69855    | (62) | KTVISNPVLEEALLNG--ANLKAGNT-IPCAESCQWIPCT---VTALIGCG  |     |

```

cyclotide precursor 5 ACG69856 (45) ETVISNPVLEEALTAFS--KKGLEG-RLCGERCVIERTRAWCRTVGCICS
cyclotide precursor 5 ABI48960 (45) ETVISNPVLEEALTAFS--KKGLEG-RLCGERCVIERTRAWCRTVGCICS
  Violacin A Q2HY54 (56) KTLISNPVLEEGLTYTYTNKKLGDSAISCGETCFKFKCY-----TPRCSS
    Kalata B1 P56254 (71) -----AKTSETADQVFLKQLQIKGLPVCGETCVGGTCN-----TPGCT
    Kalata B2 P58454 (97) LPMRAGGKTSSETLHMFLKEMQIKGLPVCGETCFGGTCN-----TPGCS
    Kalata B3/B6 P58455 (98) LPKRAGVKSSSETLTMFLKEMQIKGLPVCGETCFGGTCN-----TPGCT
    Kalata B7 P58457 (60) -----S--SETLTMFLKEMQIKGLPVCGETCFGLGTCY-----TQGCT
  Pro-tricyclons P0C589 (146) KTLISNPVLEEALVSHFNKRLGGTIFDCGESCFGLGTCY-----TKGCS
    Consensus (151) KTVISNPVLEEALLK      GL G IPCGESCVWIPC      ITA IGCS

```

recognition sequence

|----|

```

151 200
cyclotide vitri-A B1NRR3 (91) CK-SKVCYR-NSL-----DN-----
cyclotide vibi-E B1NRQ8 (92) CS-NKVCYN-SLQTKY-----
cyclotide vibi-I B1NRQ9 (91) CK-SKVCYR-NSL-----DN-----
cyclotide vibi-J B1NRR0 (94) CK-SKVCYR-NSLA-----
cyclotide vibi-K B1NRR1 (91) CK-SKVCYR-NSL-----DN-----
cyclotide precursor Vbc1 ABW08090 (92) CS-NKVCYN-SLQTKY-----
cyclotide precursor Vbc2 ABW08091 (91) CK-SKVCYR-NSL-----DN-----
cyclotide precursor Vbc3 ABW08092 (94) CK-SKVCYR-NSLA-----
cyclotide precursor Vbc4 ABW08093 (91) CK-SKVCYR-NSL-----DN-----
cyclotide precursor Vbc5 ABW08094 (91) CK-SKVCYR-NSL-----DN-----
cyclotide precursor Vbc6 ABW08095 (91) CK-SKVCYR-NSL-----DN-----
cyclotide precursor Mra13 ACI29317 (93) CQ-GKVCY-----
  Cycloviolacin O8 P58440 (107) CK-SKVCYR-NSLA-----
  Cycloviolacin O9 B1NRR2 (91) CK-SKVCYR-NSL-----DN-----
  Cycloviolacin O11 P58443 (107) CK-SKVCYR-NSLA-----
  Cycloviolacin O13 Q5USN8 (103) CK-SKVCYR-NSL-----DN-----
cyclotide precursor c1 ACI29323 (107) CK-SKVCYR-NSLA-----
  cyclotide precursor 1 ABI48956 (101) CS-SKVCYR-NSL-----HM-----
cyclotide precursor 1a ACG69841 (101) CS-SKVCYR-NSL-----HM-----
cyclotide precursor 1c ACG69843 (101) CK-SKVCYR-NSL-----HM-----
  cyclotide precursor 2 ABI48957 (101) CK-SKVCYR-NSL-----DM-----
cyclotide precursor 2a ACG69844 (101) CK-SKVCYR-NSL-----DM-----
cyclotide precursor 2b ACG69845 (101) CK-SKVCYR-NSL-----DM-----
cyclotide precursor 2c ACG69846 (101) CK-SKVCYR-NSL-----DM-----
cyclotide precursor 2d ACG69847 (101) CS-SKVCYR-NSL-----DM-----
cyclotide precursor 2e ACG69848 (102) CK-SKVCYR-NSL-----DM-----
  cyclotide precursor 3 ABI48958 (104) CK-DKVCY-----NSL-----DI-----
cyclotide precursor 3a ACG69849 (99) CK-NSRCQK-----NSL-----DI-----
cyclotide precursor 3b ACG69850 (104) CK-NKVCYR-KSL-----DI-----
cyclotide precursor 3c ACG69851 (104) CK-DKVCY-----NSL-----DI-----
cyclotide precursor 3d ACG69852 (103) CK-SKVCYR-NSL-----DN-----
  cyclotide precursor 4 ABI48959 (107) CK-DKVCYN-SLQTKY-----
cyclotide precursor 4a ACG69853 (107) CK-DKVCYN-SLQTKY-----
cyclotide precursor 4b ACG69854 (107) CS-DKVCYN-SLQTKY-----
cyclotide precursor 4c ACG69855 (107) CK-DKVCYN-SLQTKY-----
  cyclotide precursor 5 ACG69856 (92) LH-TLECYR-NSL-----PM-----
  cyclotide precursor 5 ABI48960 (92) LH-TLECYR-NSL-----PM-----
  Violacin A Q2HY54 (100) CS-YPVCK-----
    Kalata B1 P56254 (109) CS-WPVCTR-NGI-----PSLAA-----
    Kalata B2 P58454 (141) CT-WPICTR-DSL-----PMSAGGKTSETLHMFLKEMQIKGLPVCGETCFGGCT*
    Kalata B3/B6 P58455 (142) CDPWPICTR-DGL-----PSAAA-----
    Kalata B7 P58457 (96) CS-WPICKR-NGI-----PDVAA-----
  Pro-tricyclons P0C589 (190) CGEWKLCYGENSLAI-----
    Consensus (201) CK SKVCYR NSL

```

\*Kalata B2 P58454 has an unusually long precursor peptide. The additional C-terminal extension is shown below.

```

251 272
Kalata B2 P58454 (189) NTPGCSCTWPICTRDSLPLVAA

```



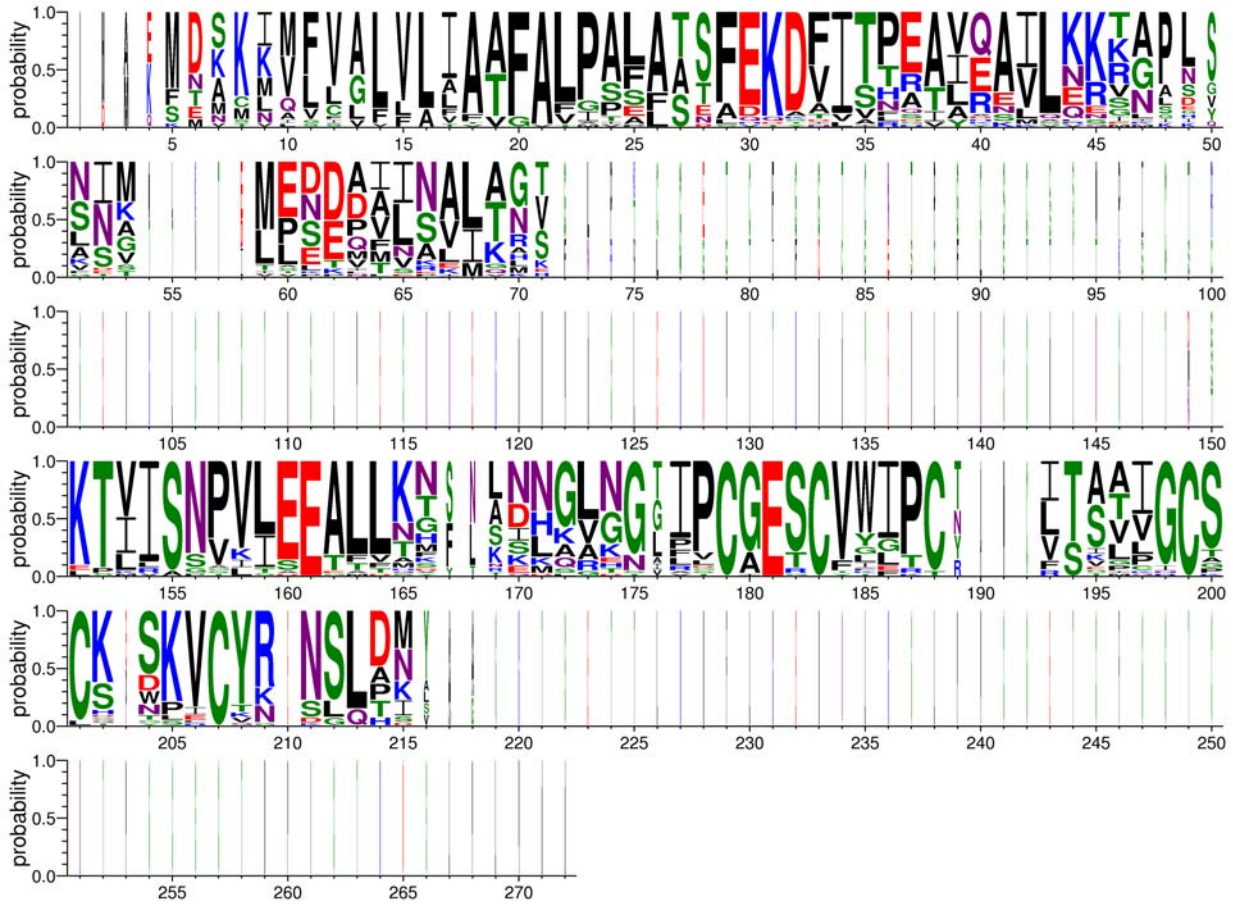

**NOTE:** The stretches of narrow letters are due to the unusually long precursor peptides for Protricyclon P0C589 and Kalata B2 P58454.



**Supplementary Figure 10. Sequence alignment of the precursor peptides of selected thiopeptides.**

The logo below the alignments shows the probability of each amino acid (height of the letter) and is scaled (width of the letter) according to how many sequences contributed to that position (i.e. narrow letters were generated from a smaller number of sequences than wider letters). Some of the leader peptides are of the double Gly type (e.g. thiamuracin and the thiocillins). Two highly conserved Leu residues are found in the leader as well as a preponderance of Asp and Glu residues.

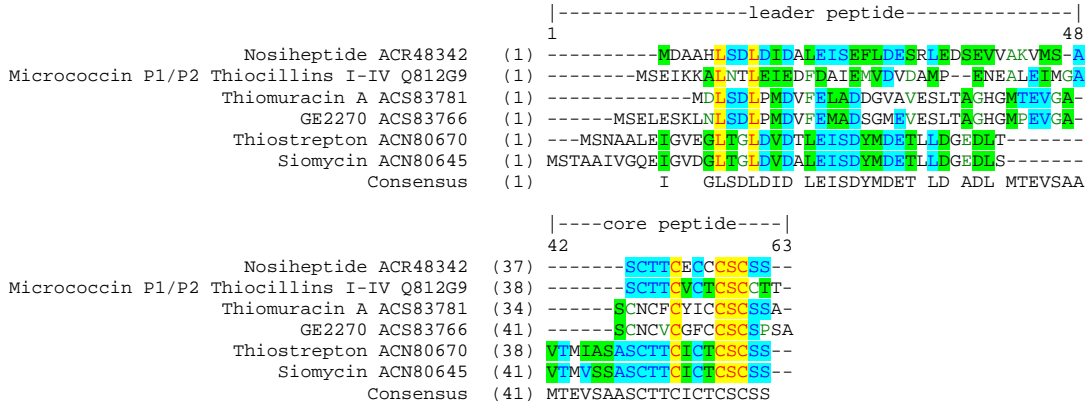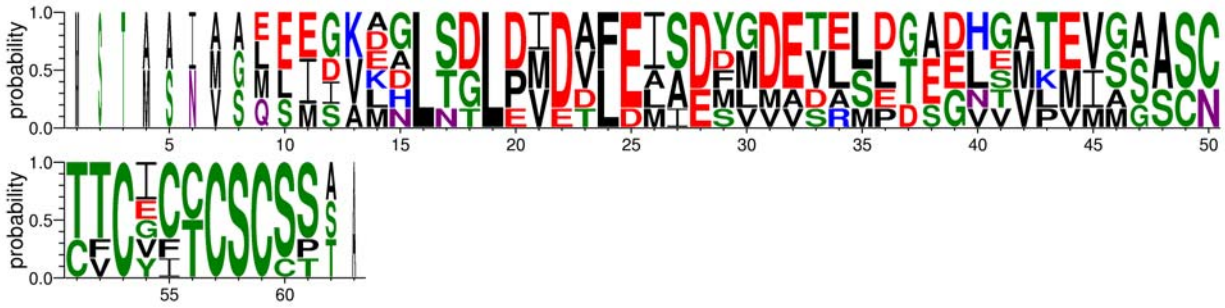

**Supplementary Figure 11. Sequence alignment of selected precursor peptides of microviridins.** The logo below the alignments shows the probability of each amino acid (height of the letter) and is scaled (width of the letter) according to how many sequences contributed to that position (i.e. narrow letters were generated from a smaller number of sequences than wider letters). Two highly conserved Phe residues are found in the leader peptide. The precursor peptide from *Anabaena* that contains multiple core peptides is shown at the bottom.

```

|-----leader peptide-----|
1                               41
Microviridin B (NIES298) CAQ16116 (1) ----MAYPNDQGGKALPFFARFLSVSKEESSIKSPSPSEPT-
Microviridin B (NIES843) BAG02233 (1) ----MAYPNDQGGKALPFFARFLSVSKEESSIKSPSPSEPT-
Microviridin B (UWOCC) CAQ16121 (1) ----MAYPNDQGGKALPFFARFLSVSKEESSIKSPSP-DHE
Microviridin 2 ACC54552 (1) ---MKNIKVSTGSAVPPFFARFLSEQDTEFGDSTSLD-IPT
Microviridin K ACC54551 (1) ---MKNVKVSAKAVPPFFARFLAEQAVEANNSNS---AP-
Microviridin J (1) TPEPSPSKISSSEKSVSLFRAPFPFLAK--GQQDNF--YAM-
Consensus (1) SAYPNDSQGGKALPFFARFLSVSKEESSIKSPSP

```

```

core peptide
|-----|
42       55
Microviridin B (NIES298) CAQ16116 (36) FGTTLKYPDWE EY
Microviridin B (NIES843) BAG02233 (36) YGTFKYPDWE D Y
Microviridin B (UWOCC) CAQ16121 (36) -ISTRKYPDWE EW
Microviridin 2 ACC54552 (37) -IWTFKWPSDWE DS
Microviridin K ACC54551 (35) YGNTMKYPDWE EY
Microviridin J (37) FGTTLKYPDWE EY
Consensus (41) FGTTLKYPDWE EY

```

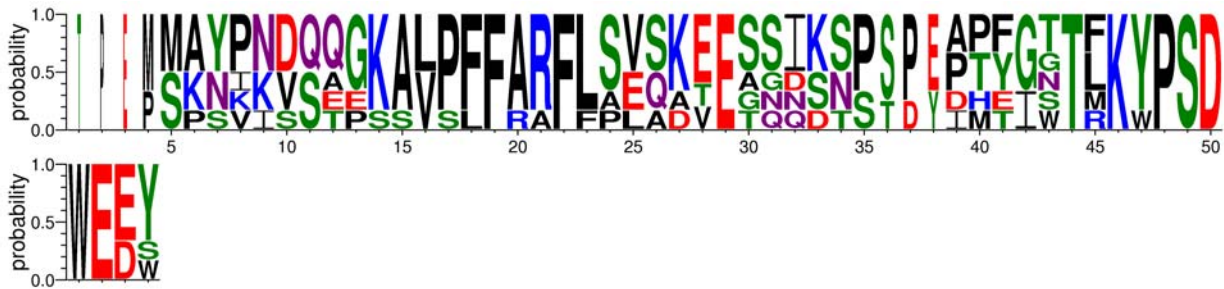

```

core peptide
|-----leader peptide-----|-----|
1                               50
Anabaena PCC7120 (1) MPENRQEDLNAQAVPPFFARFLEGQNCEDLTDEESEAVSGGKPGQTRKYP S

core peptide core peptide
---|-----|-----|
51       100
Anabaena PCC7120 (51) DCEDGNGVTGKLRDEDIAVTLKYPDNEDNGGGEIVTLKFP SDDDDQPVG

```

**Supplementary Figure 12. Sequence alignment of the precursor peptides for selected conopeptides.** The logos below the alignments show the probability of each amino acid (height of the letter) and are scaled (width of the letter) according to how many sequences contributed to that position (i.e. narrow letters were generated from a smaller number of sequences than wider letters).

**Conopeptides lacking disulfide crosslinks**

**a. Conantokins**

```

|-----signal-----|-----
1                               50
Conantokin-E P0C8D9 (1) -----LLVPLVTFHLLILGMGTLDHGGALTERRSADATALKPEPVLLQ
Conantokin-P P0C8E3 (1) MQLYTYLYLLVPLVTFHLLILSTGTLAHGGTLTERRSTDTTALKPEPVLLQ
Conantokin-G P07231 (1) MHLTYTYLYLLVPLVTFHLLILGTGTLDDGGALTERRSADATALKPEPVLLQ
Conantokin-L P69745 (1) MQLYTYLYLLVPLVTFHLLILGTGTLDHGGALTERRSTDAIALKPEPVLLQ
Conantokin-R P58806 (1) MQLYTYLYLLVSLVTFYLLILGTGTLGHGGALTERRSTDAALKPEPVLLQ
Consensus (1) MQLYTYLYLLVPLVTFHLLILGTGTLDHGGALTERRSTDAALKPEPVLLQ

```

```

-----leader peptide-----|
51                               100
Conantokin-E P0C8D9 (43) KSDARSTDDNDKDRLTQMKRILKRRGNKARGEEESHKYQ-ECLREIRVNN
Conantokin-P P0C8E3 (51) KSDARSTDDNDKDRLTQMKRILKRRGNKARGEEESHKYQ-ECLREIRVTK
Conantokin-G P07231 (51) KSDARSTDDNDKDRLTQMKRILKRRGNKARGEEELQENQ-ELREKSNK
Conantokin-L P69745 (51) KSSARSTDDNCGNDRLTQMKRILKRRGNKARGEEEVAKMAAEAREDAVNG
Conantokin-R P58806 (51) KSSARSTDDNCGNDRLTQMKRILKRRGNKARGEEEVAKMAAEARENIAGK
Consensus (51) KSSARSTDDNCGKDRLTQMKRILKRRGNKARGEEEVAK Q ELLRE VN

```

```

101
Conantokin-E P0C8D9 (92) VQQEC--
Conantokin-P P0C8E3 (100) VQQEC--
Conantokin-G P07231 (100) R-----
Conantokin-L P69745 (101) K-----
Conantokin-R P58806 (101) CKVNCYP
Consensus (101) C

```

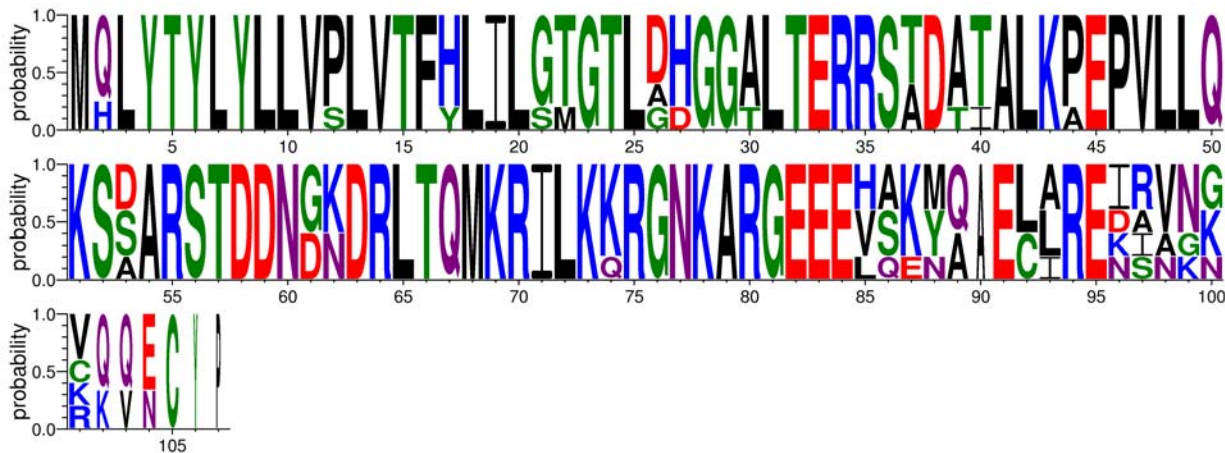

This family has highly conserved leader peptides including an AlaArg protease cleavage site to remove the leader peptide. One highly conserved Pro at position 46 is unusual in leader peptides.

**b. Contulakins**

```

|-----signal-----|-----leader peptide-(G)---|
|-----signal-----|-----leader peptide-----|
1                                                                50
Contulakin-G Q9XYR5 (1) MQTAYWVMVMMVWIAAPLSEGGKLNDAIRGLVPDDLTPQLLQSLVSRH
Contulakin-Lt1 Q2I2P1 (1) MRTAYWVMVMMVGIITAPLSEGRKLNDAIRGLVADYITPQLLQSLVSAPY
Contulakin-Lt2 Q2I2P2 (1) MQMAYWVMVMMVGIITAPLSEGRKLNDAIRGLVPNDLTPQLLQSLVSRH
Consensus (1) MQTAYWVMVMMVGIITAPLSEGRKLNDAIRGLVPDDLTPQLLQSLVSARH

```

```

                                recognition sequences
                                |------(G)-----|
                                |------(G)-----|
---(Lt)---|                                |---(Lt)---|
51                                                                85
Contulakin-G Q9XYR5 (51) QSEEGGSNATKKEYILRASDQVASGP-----
Contulakin-Lt1 Q2I2P1 (51) PEFQDDPNLEIPVCIWKVCPPIPWRRDLKCRNK
Contulakin-Lt2 Q2I2P2 (51) RVEHLDNTYIKIPIICANKVCPPIPWRRDLKCRNK
Consensus (51) F LD LKIPICIWKVCPP PWRRDLKCRNK

```

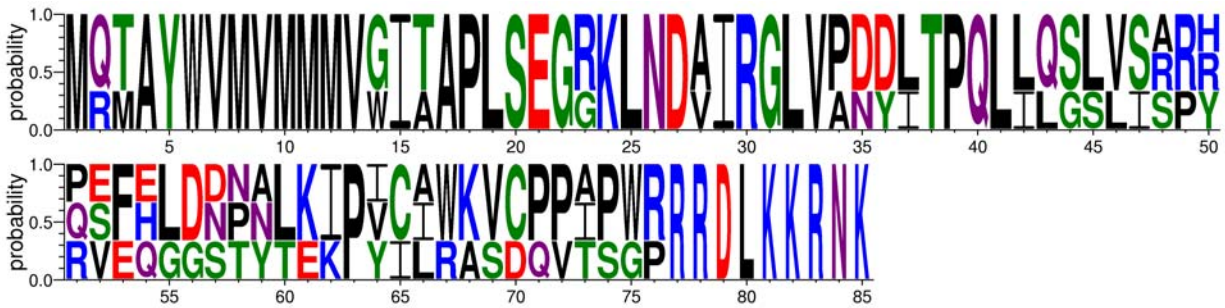

This presently small family (in terms of full sequence information) has highly conserved leader peptides including a conserved Pro at position 39.

**Conopeptides with one disulfide**

**c. Contryphans**

|                                     |     |                                                    |
|-------------------------------------|-----|----------------------------------------------------|
|                                     |     | -----signal----- -----leader peptide-----          |
|                                     | 1   | 50                                                 |
| Contryphan-R/bromocontryphan P58786 | (1) | MGKLTILVLVAAVLLSAQVMVQGGDQPADRNAVPRDDNPGGASGKFMNV  |
| Contryphan-Lt ABC74997              | (1) | MGKLTILLVAAALLSTQVMVQGGDQPAARNVPRDDNPDMSGQFMNV     |
| Contryphan-Lt Q2I2P3                | (1) | MGKLTILLVAAALLSTQVMVQGGDQPAARNVPRDDNPDMSGQFMNV     |
| Contryphan-R/Tx Q9NDA5              | (1) | MGKLTILVLVAAVLLSTQAMAQGGDQPAARNVPRDDNPDGSAKFMNV    |
| Contryphan-P P58784                 | (1) | MGKLTILVLVAAVLLSTQVMVQGGDQPAYRNAAPRDDNPGGATGKFMNV  |
| Contryphan-S P0C837                 | (1) | MEKLTILVLVAAVLLSTQVMVQGLADQPADRDVPRDDNAGGTDGKFMNV  |
| Contryphan-Sm P58787                | (1) | MGKLTILVLVAAVLLSTQVMVQGLADQPADRDVPRDDNPGSTGKFMNV   |
| Contryphan-Tx Q9NDA7                | (1) | MGKLTILVLVAVALLLSTQVMVQGGDQPADRDVPRDDNPGGMSKFLNA   |
| Glacontryphan-M P62903              | (1) | MGKLTILVLVAAVLLSTQVMVQGLRDQPADRNAVPRDDNPGRRARRKMKV |
| D-Leu-contryphan-Tx Q9NDA6          | (1) | MGKLTILVLVAAVLLSAQVMVQGGDQPADRKAVPREDNPGGASGKLMNV  |
| Consensus                           | (1) | MGKLTILVLVAAVLLSTQVMVQGGDQPADRNAVPRDDNPGG SGKFMNV  |

|                                     |      |               |    |
|-------------------------------------|------|---------------|----|
|                                     |      | ---           |    |
|                                     |      | 51            | 63 |
| Contryphan-R/bromocontryphan P58786 | (51) | LRRSGCPWEPWCG |    |
| Contryphan-Lt ABC74997              | (51) | LRRSGCPWEPWCG |    |
| Contryphan-Lt Q2I2P3                | (51) | LRRSGCPWEPWCG |    |
| Contryphan-R/Tx Q9NDA5              | (51) | QRRSGCPWEPWCG |    |
| Contryphan-P P58784                 | (51) | LRRSGCPWEPWCG |    |
| Contryphan-S P0C837                 | (51) | QRRSGCPWEPWCG |    |
| Contryphan-Sm P58787                | (51) | LRRFGCPWEPWCG |    |
| Contryphan-Tx Q9NDA7                | (51) | LQRRGCPWEPWCG |    |
| Glacontryphan-M P62903              | (51) | LNESECWHPWCG  |    |
| D-Leu-contryphan-Tx Q9NDA6          | (51) | LRPKKCVLYPWCG |    |
| Consensus                           | (51) | LRRSGCPWEPWCG |    |

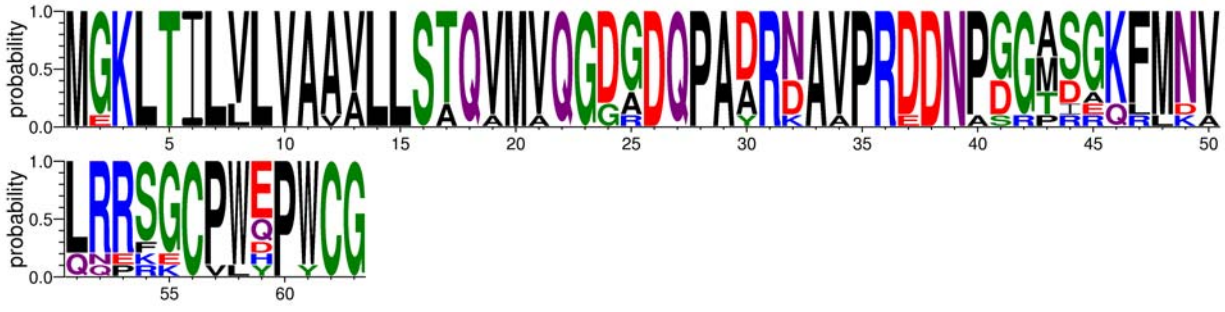

This family has highly conserved leader peptides including three highly conserved Pro residues at positions 28, 35, and 40, which is unusual in leader peptides.



*d. Conopressins*

|                                |       |          |                |                       |                   |
|--------------------------------|-------|----------|----------------|-----------------------|-------------------|
|                                |       | 1        |                | 50                    |                   |
| Conopressin/neurophysin Q00945 | (1)   | MMSI     | CGMPLTYLTAAVI  | SLS-ITDACFIRNCPKGGKRS | LDTGMVTSRE        |
| Lys-conopressin BAB40371       | (1)   | -MSPL    | SVRTFVLVAGLAVI | SFSVADACFIRNCPKGGKRS  | MDMQLLGQRQ        |
| Consensus                      | (1)   | MS L     | L AVIS S L     | DACFIRNCPKGGKRS       | LD LL R           |
|                                |       | 51       |                | 100                   |                   |
| Conopressin/neurophysin Q00945 | (50)  | CMKCGP   | GGTGQCVGPS     | ICCGQDFGCHVGTAE       | AAVCQQENDS        |
| Lys-conopressin BAB40371       | (50)  | CMSCGP   | DIGQCVGPN      | ICCSPHFGCHVGTPE       | TEVCQKENQST       |
| Consensus                      | (51)  | CM CGP G | GQCVGP ICC     | FGCHIGT E             | VCQ EN SSSPC VKGE |
|                                |       | 101      |                | 150                   |                   |
| Conopressin/neurophysin Q00945 | (100) | ACGSRD   | AGNCVADGICCDSE | SCAVNDRCR             | DLDGN-----A       |
| Lys-conopressin BAB40371       | (100) | TCGYRD   | TGNCVAN        | GICCDSESCAVNDRCR      | LRKETSRSGFDDT     |
| Consensus                      | (101) | CG RD    | GNCVA          | GICCDSESCAVNDRCR      | QA RADLI          |
|                                |       | 151      |                | 163                   |                   |
| Conopressin/neurophysin Q00945 | (143) | QLIHKLL  | KVRDYD         |                       |                   |
| Lys-conopressin BAB40371       | (150) | KLIQKLL  | RAKED          |                       |                   |
| Consensus                      | (151) | LI KLLK  | KD D           |                       |                   |

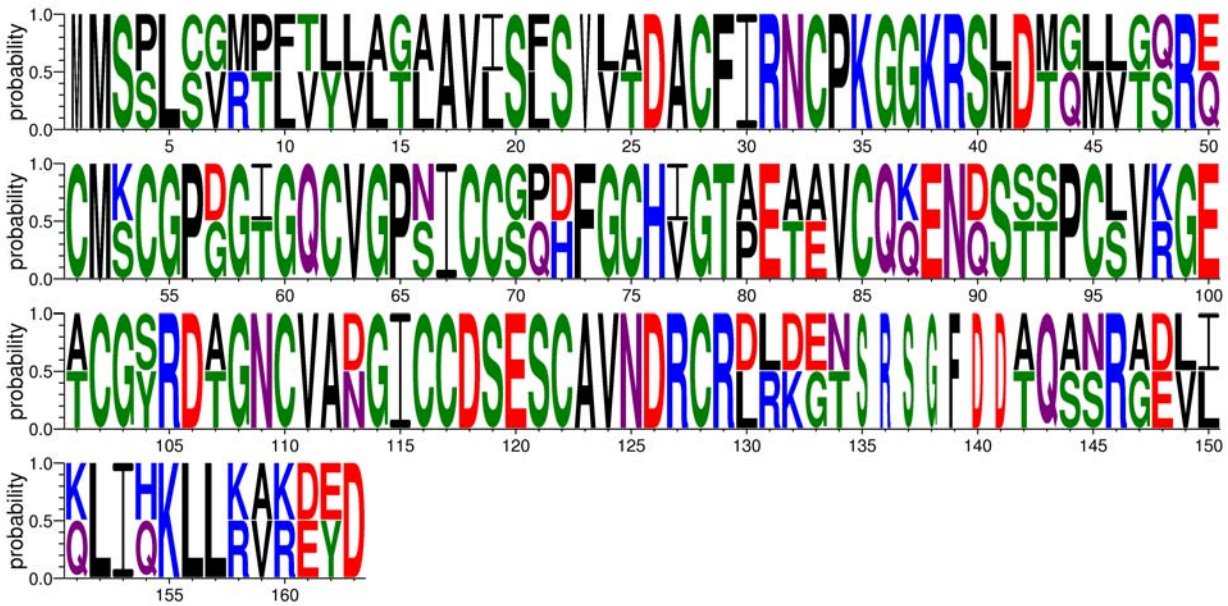



## Disulfide Rich Conopeptides

### e. O-Superfamily

|                                     |     | -----signal----- -----leader peptide-----              |      |
|-------------------------------------|-----|--------------------------------------------------------|------|
|                                     |     |                                                        | 1 50 |
| Delta-conotoxin Ac6.1 P0C8V5        | (1) | MKLTCCVVIIVAVLFLTAWTFVMADDSR-YGLKDLFPKARHEMKNPEASKLN   |      |
| Delta-conotoxin Ac6.2 P0C8V6        | (1) | MKLTCCVVIIVAVLFLTAWTFVTADDSR-YGLKDLFPKARHEMKNPEASKLN   |      |
| Delta-conotoxin S6.8 B2KJ30         | (1) | MKLTCCMMIIVAVLFLTAWTFVTADDSR-NGLKDLFPKARHEMKNPEASKLN   |      |
| delta-conotoxin SVIF ABF69254       | (1) | MKLTCCMMIIVAVLFLTAWTFVTADDSR-NGLKDLFPKARHEMKNPEASKLN   |      |
| Delta-conotoxin SVIE Q9XZK5         | (1) | MKLTCCVMIIVAVLFLTWTFTADDSR-YGLKDLFPKARHEMKNPEASKLN     |      |
| Omega-conotoxin 9 Q5K0D2            | (1) | MKLTCCMMIIVAVLFLTWTFTADDSR-YGLKDLFPKARHEMKNPEASKLN     |      |
| Delta-conotoxin PVIA P58913         | (1) | MKLTCCVMIIVAVLFLTAWTFVTADDSK-NGLEHFHWKARDEMKNREASKLD   |      |
| Delta-conotoxin Ac6.3 P0C8V7        | (1) | MKLTCCMMIIVAVLFLTAWTFVTADDSR-NGLENI SPKARHEMKNPEASKSN  |      |
| Delta-conotoxin Ai6.1 P0CB09        | (1) | MKLTCCVMIIVAVLFLTAWTFATADDPN-NGLGNLFSNAHHEMKNPEASKLN   |      |
| Delta-conotoxin TxVIA P18511        | (1) | MKLTCCMMIIVAVLFLTAWTFATADDPN-NGLGNLFSNAHHEMKNPEASKLN   |      |
| Omega-conotoxin TeA61 Q3YEF3        | (1) | MKLTCCMMIIVAVLFLTAWTFATADDS-NGLGNLFLKAHHEMKNPEASKLN    |      |
| Omega-conotoxin TxMKLT1-0141 Q9U651 | (1) | MKLTCCMMIIVAVLFLTAWTFATADDS-NGLENI SPKARHEMKNPEASKLN   |      |
| Omega-conotoxin TxMKLT1-0142 Q9U650 | (1) | MKLTCCMMIIVAVLFLTAWTFATADDS-NGLENI SPKARHEMKNPEASKLN   |      |
| Omega-conotoxin TxO1 Q9XZK8         | (1) | MKLTCCVVIIVAVLFLTVWTFATADDSG-NGLEKLFNSNAHHEMKNPEASKLN  |      |
| Omega-conotoxin TxO5 Q9XZL2         | (1) | MKLTCCVMIIVAVLFLTAWTFVTAITS--NGLENI FPNAHHEMKNPEASKLN  |      |
| Omega-conotoxin 2/7 Q5K0B9          | (1) | MKLTCCMMIIVAVLFLTASIFIADN-SRNGIENIPRMRRHEMKNPEASKLN    |      |
| Omega-conotoxin 3 Q5K0C0            | (1) | MKLTCCMMIIVAVLFLTASIFIADN-SRNGIENIPRMRRHEMKNPEASKLN    |      |
| Omega-conotoxin 12 Q5K0D6           | (1) | MKLTCCVVIIVAVLFLTACQLITADDS-----RGTQKIRSLRSTTKVSKA     |      |
| Omega-conotoxin SO-4 Q9XZK3         | (1) | MKLTCCVMIIVAVLFLTACQLITADDS-----RGTQKIRSLRSTTKVSKA     |      |
| Omega-conotoxin 2 Q5K0D8            | (1) | MKLTCCVVIIVAVLFLTACQLITADDS-----RGTQKIRSLRSTTKVSKA     |      |
| Omega-conotoxin Ac6.5 P0C8V9        | (1) | MKLTCCVVIIVAVLFLTACQLITADDS-----RGTQKIRSLRSTTKVSKA     |      |
| Omega-conotoxin 6 Q5K0D3            | (1) | MKLTCCVVIIVAVLFLTACQLITADDS-----RGTQKIRSLRSTTKVSKS     |      |
| Omega-conotoxin SO-5 Q9XZK4         | (1) | MKLTCCVMIIVAVLFLTACQLITADDS-----RGTQKIRSLRSTTKVSKS     |      |
| Omega-conotoxin 15 Q5K0D5           | (1) | MKLTCCVVIIVAVLFLTACQLITAEEDS-----RGTQKIRTLRSTARRSKS    |      |
| Omega-conotoxin SVIA P28880         | (1) | MKLTCCVMIIVAVLFLTACQLITAEEDS-----RGTQKIRTLRSTARRSKS    |      |
| Omega-conotoxin Ac6.4 P0C8V8        | (1) | MKLTCCVVIIVAVLFLTACQLITADDS-----RGTQKIRALRSDTKLSMS     |      |
| Omega-conotoxin S6.6 P0C831         | (1) | MKLTCCVVIIVAVLFLTACQLITADDS-----RGTQKIRALRSDTKLSMS     |      |
| Omega-conotoxin CVIA P58917         | (1) | MKLTCCVVIIVAVLFLTACQLITANDS-----RGTQKIRALRSDTKLSMS     |      |
| Omega-conotoxin SVIB P28881         | (1) | MKLTCCVVIIVAVLFLTACQLITADDS-----RGTQKIRALRSDTKLPMS     |      |
| Omega-conotoxin CVID P58920         | (1) | MKLTCCVVIIVAVLFLTACQLITADDS-----RGTQKIRALRSDTKLSMS     |      |
| Omega-conotoxin SO-3 Q9XZK2         | (1) | MKLTCCVMIIVAVLFLTACQLITADDS-----RGTQKIRTLRSTTKLSMS     |      |
| Omega-conotoxin GVIA P01522         | (1) | MKLTCCVVIIVAVLFLTACQLITADDS-----RGTQKIRALGSTTELS       |      |
| Omega-conotoxin PuIIA Q9XYZ1        | (1) | MKLTCCVVIIVAVLFLTACQLITAEYTS-----RGEQKIRALRSTDKNSKL    |      |
| Omega-conotoxin 10 Q5K0C4           | (1) | MKLTCCVLIIVVLEFLTACQLITTDSDS-----TGKQRYQAWKLRSKMQNS    |      |
| Omega-conotoxin MVIIA P05484        | (1) | MKLTCCVVIIVAVLFLTACQLITADDS-----RGTQKIRALRSTTKLSTS     |      |
| Kappa-conotoxin PVIIA P56633        | (1) | MKLTCCVVIIVVLEFLTACQLITADDS-----RRTQKIRALRSTTKLS       |      |
| Omega-conotoxin Ai6.2 P0CB10        | (1) | MKLTCCVMIIVAVLFLTAWTFATADDSG-NGLENI FSKAHHEMKNPEASKLN  |      |
| Omega-conotoxin TxO6 Q9XZL3         | (1) | MKLTCCVVIIVAVLFLTAWTFVLMADDSN-NGLANLFSKSRDEMEDPEAAKLE  |      |
| Omega-conotoxin Ai6.3 P0CB11        | (1) | MKLTCCVMIIVAVLFLTAWTFVTAVPDSSNALENIYLKAHHEMKNPEDESELN  |      |
| Omega-conotoxin TeAr94 Q9U647       | (1) | MKLTCCMMIIVAVLFLTAWTFVTA VPHSSNALENIYLKAHHEMKNPEDESELN |      |
| Omega-conotoxin TxO2 Q9XZK9         | (1) | MKLTCCVVIIVAVLFLTAWTFVTAAPHSSNALENIYLKAHHEMKNPEDESELN  |      |
| Omega-conotoxin TxMKLT1-0211 Q9U648 | (1) | MKLTCCMMIIVAVLFLTAWTFVTA VPHSSNALENIYLKAHHEMKNPEDESELN |      |
| Omega-conotoxin TxO3 Q9XZL0         | (1) | MKLTCCVVIIVAVLFLTAWTFVTA VPHSSNALENIYLKAHHEMKNPEDESELN |      |
| Omega-conotoxin MaIr137 Q3YED6      | (1) | MKLTCCMMIIVAVLFLTAWTFVTA VPHSSDVLENIYLKALHETENHEASKLN  |      |
| Omega-conotoxin TxO4 Q9XZL1         | (1) | MKLTCCVVIIVAVLFLTAWTFVTA VPHSSNALENIYLKAHHEMKNPEASKLN  |      |
| Omega-conotoxin Vc6.4 P69761        | (1) | MKLTCCVMIIVAVLFLTANTFVTA VPHSSNVALENIYLKARHEMKNPEASKLN |      |
| Omega-conotoxin PuIA Q9XYZ0         | (1) | MKLTCCVMIIVAVLFLTAWTFVTADDSIR--ALDELFAKAPDEMENSASPLN   |      |
| Mu-O-conotoxin MrVIB Q26443         | (1) | MKLTCCMMIIVAVLFLTAWTFVLMADDSN-NGLANLHFLKSRDEMEDPEASKLE |      |
| Consensus                           | (1) | MKLTCCVVIIVAVLFLTAWTF TADDS L NL AHHEM NP AS LN        |      |

  

|                                     |      | -                                          |    |
|-------------------------------------|------|--------------------------------------------|----|
|                                     |      | 51                                         | 92 |
| Delta-conotoxin Ac6.1 P0C8V5        | (50) | KR--DECFS--PCTFCGIKPGLCSSAWY SFFCLTLTF---- |    |
| Delta-conotoxin Ac6.2 P0C8V6        | (50) | KR--DECYP--PCTFCGIKPGLCSERF PPFVCLSLEF---- |    |
| Delta-conotoxin S6.8 B2KJ30         | (50) | KR--DGCSN--AGGFCGIHPGLCCSEI CLVWCT-----    |    |
| delta-conotoxin SVIF ABF69254       | (50) | KR--DGCSN--AGGFCGIHPGLCCSEI CLVWCT-----    |    |
| Delta-conotoxin SVIE Q9XZK5         | (50) | KR--DGCSN--GCTFCGIHPGLCCSEF CLWCITFID----  |    |
| Omega-conotoxin 9 Q5K0D2            | (50) | KR--EGCSS--GCTFCGIHPGLCCSEF CLWCITFID----  |    |
| Delta-conotoxin PVIA P58913         | (50) | KK--EACYA--PCTFCGIKPGLCSEF CLPGVCFGG-----  |    |
| Delta-conotoxin Ac6.3 P0C8V7        | (50) | KR--YECYS--TCTFCGVNGGLCCSNL CLFFVCLFS----- |    |
| Delta-conotoxin Ai6.1 P0CB09        | (50) | KR--WCKQ---SSEMNLDDQNCCEGY IVLVCT-----     |    |
| Delta-conotoxin TxVIA P18511        | (50) | KR--WCKQ---SSEMNLDDQNCCEGY IVLVCT-----     |    |
| Omega-conotoxin TeA61 Q3YEF3        | (50) | ER--CLD---AGEVCDIFFPPTCCG-Y ILLFCA-----    |    |
| Omega-conotoxin TxMKLT1-0141 Q9U651 | (50) | ER--CLD---AGEICDFFPPTCCG-Y ILLFCA-----     |    |

```

Omega-conotoxin TxMKLT1-0142 Q9U650 (49) ER--CLD---A-GEICDFFFP-CCG-Y-ILLFCA-----
Omega-conotoxin Tx01 Q9XZK8 (50) ER--CLD---A-GEVCDIFFFP-CCG-Y-ILLFCA-----
Omega-conotoxin Tx05 Q9XZL2 (49) KR--CVP---YEGPNWLTQNC-DATVVFVCL-----
Omega-conotoxin 2/7 Q5K0B9 (50) KR--VCIADDMPCGFLFGGPL-CCSGW-LFVCL-----
Omega-conotoxin 3 Q5K0C0 (50) KR--GCLPDEYFCGFSMIGALL-CCSGW-LGICMT-----
Omega-conotoxin 12 Q5K0D6 (44) -----TDCIEA-NCYCGPTVMKIC-CCGF-SPYS-KICMNYPKN
Omega-conotoxin SO-4 Q9XZK3 (44) -----TDCIEA-NCYCGPTVMKIC-CCGF-SPYS-KICMNYPKN
Omega-conotoxin 2 Q5K0D8 (44) -----ADCIEA-NCYCGPTVMKIC-CCGF-SPYS-KICMNYPKN
Omega-conotoxin Ac6.5 P0C8V9 (44) -----TDCIEA-NCYCGPTVMKIC-CCGF-SPFS-KICMNYPQN
Omega-conotoxin 6 Q5K0D3 (44) -----TSCMEA-ASYCG-STTRIC-CCGY-CAYFG-KKCIDYPSN
Omega-conotoxin SO-5 Q9XZK4 (44) -----TSCMEA-ASYCG-STTRIC-CCGY-CAYFG-KKCIDYPSN
Omega-conotoxin 15 Q5K0D5 (44) ELT---TRCRPS-SPCG--VTSIC-CCR-YSR---GKCT-----
Omega-conotoxin SVIA P28880 (44) EST---TRCRSS-SPCG--VTSIC-CCR-YSR---GKCT-----
Omega-conotoxin Ac6.4 P0C8V8 (44) -----TRCKGK-ASCSRTMYN-CC-TGS-ENR---GKCG-----
Omega-conotoxin S6.6 P0C831 (44) -----TRCKGK-APORKTMYD-CCSGS-CGR--RGKCG-----
Omega-conotoxin CVIA P58917 (44) -----TRCKST-ASCRRTSYD-CC-TGS-ENR--S-GRCG-----
Omega-conotoxin SVIB P28881 (44) -----TRCKLK-QSORKTSYD-CCSGS-CGR--SGKCG-----
Omega-conotoxin CVID P58920 (44) -----TRCKSK-AKCSKLMYD-CCSGS-ESGTV-GRCG-----
Omega-conotoxin SO-3 Q9XZK2 (44) -----TRCKAA-KPCSRIAYN-CC-TGS-ENR--S-GKCG-----
Omega-conotoxin GVIA P01522 (44) -----TRCKSP-SSCSPTSYN-CC-RSCNP--YTKRCYG----
Omega-conotoxin PuIIA Q9XYZ1 (45) T-----RTCNTPTQY-CT-LHRH-CCS-LY-CHKTIHACA-----
Omega-conotoxin 10 Q5K0C4 (44) VLSRLSKRCDEE-CTGCS-SDSE-CCSGR-CTPEGLFEFCE----
Omega-conotoxin MVIIA P05484 (44) -----TRCKGK-AKCSRLMYD-CC-TGS-ENR--S-GKCG-----
Kappa-conotoxin PVIIA P56633 (44) -----TRCRIPNQK-CFQHLDD-CCSRK-ENR--FNKCV-----
Omega-conotoxin Ai6.2 P0CB10 (50) KR--CTQ---S-ELDVIDDP-CCNNF-CIIFFCI-----
Omega-conotoxin Tx06 Q9XZL3 (50) KN--YCQEKWDYCPVPLGSR-CCDGLFCTLFCA-----
Omega-conotoxin Ai6.3 P0CB11 (51) KR--CYDGGTSC---NTGNQ-CCSGW-CIFLCL-----
Omega-conotoxin TeAr94 Q9U647 (51) KR--CYDSGTSC---NTGNQ-CCSGW-CIFVCL-----
Omega-conotoxin Tx02 Q9XZK9 (51) KR--CYDSGTSC---NTGNQ-CCSGW-CIFVCL-----
Omega-conotoxin TxMKLT1-0211 Q9U648 (51) KR--CYDGGTSC---DSGIQ-CCSGW-CIFVCL-----
Omega-conotoxin Tx03 Q9XZL0 (51) KR--CYDGGTSC---DSGIQ-CCSGW-CIFVCF-----
Omega-conotoxin MaIrl37 Q3YED6 (51) VRDDECEPPGDFCGF-FKIGPP-CCSGW-CFLWCA-----
Omega-conotoxin Tx04 Q9XZL1 (51) TR--YDCEPPGNFCGM-IKIGPP-CCSGW-CFFACA-----
Omega-conotoxin Vc6.4 P69761 (51) TR--YDCEPPGNFCGM-IKVGPP-CCSGW-CFFACA-----
Omega-conotoxin PuIA Q9XYZ0 (49) ER--DCRPVGYCYGIPYEHNR-CCSQL-CAIICVS-----
Mu-O-conotoxin MrVIB Q26443 (50) KR--ACSKKWEYCIIVPILGFVY-CCPLICGPFVCV-----
Consensus (51) R G C CCSG C

```

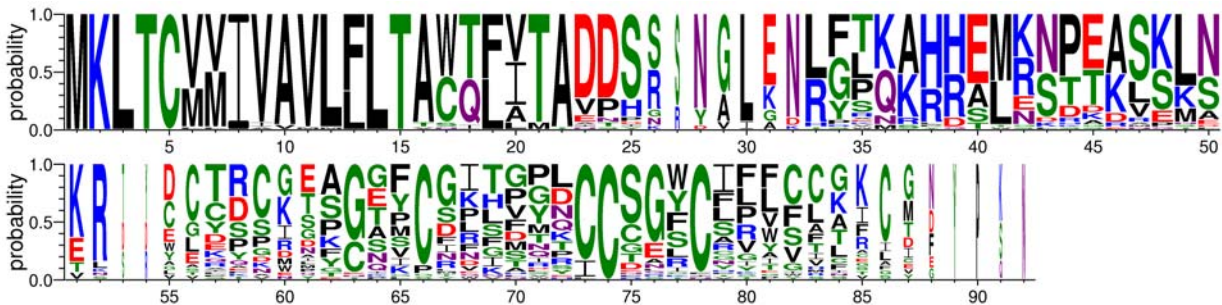

The leader peptides of this family are less conserved, possible because a large number of members are known, or reflecting the hypervariable nature of the core peptide. The Arg in the P1 position with respect to leader peptide removal (position 52 in the logo) is highly but not completely conserved.

*f. M-Superfamily*

|                                      |        |     |                                                      |    |
|--------------------------------------|--------|-----|------------------------------------------------------|----|
|                                      |        |     | -----signal----- -----leader peptide-----            |    |
|                                      |        |     | 1                                                    | 50 |
| Kappa-M-conotoxin RIIIK              | P69769 | (1) | -MSKIGVLLTICLLLFPLTALPMDGDPVDRLAERMQDNISSSEQ--HTFF   |    |
| Mu-conotoxin GIIIA                   | P01523 | (1) | -MSKIGVLLTICLLLFPLTALPMDGDEPANFVERMQDNISSSEQ--VPLF   |    |
| Mu-conotoxin PIIIA                   | P58925 | (1) | -MSKIGVLLTICLLLFPIITALPMDGDPADRPAERMQDNISSSE--HPF    |    |
| Psi-conotoxin PIIIE                  | P56529 | (1) | -MSKIGALLTICLLLFPIITALLMDGDPADRPAERMDYDSSSEV--HRL    |    |
| Psi-conotoxin PrIIIE                 | P0C7I1 | (1) | -MSKIGVLLTICLLLFPIITALPMDGDPADRPAERMQDNISSSEQ--HPFF  |    |
| M-2-superfamily conotoxin 3          | Q9BPJ7 | (1) | -MSKIGALLTICLLLFPLTAVPMDGDPADRPAERMQDNISSFEQ--HPMF   |    |
| M-2-superfamily conotoxin Tx3b       | P0C1N8 | (1) | -MSKIGALLTICLLLFSLTAVPLDGDQHADQPAQRLODRPTEDE--HPLF   |    |
| M-2-superfamily conotoxin TxMMSK-01  | Q9BPJ1 | (1) | MMSKIGVLLITCLLLFPLTAVPLDGDQPADQPAERLODDSSSEN--HPFF   |    |
| M-2-superfamily conotoxin Lt3.5      | Q2I2Q1 | (1) | MMSKIGALLTICLLLFPLTAVPLDGDQPLDRHAERMHDGSPKR--HPWF    |    |
| M-2-superfamily conotoxin Mr3.3      | P0C1N2 | (1) | -MSRIGVLLTICLLLFPLTAVPLDGDQADRPAERLODDSSSEH--HPHF    |    |
| M-2-superfamily conotoxin Mr3.4      | P0C1N3 | (1) | -MSKIGVLLTICLLLFPLTAVPLDGDQADRPAERLODDSSSEH--HPFF    |    |
| M-2-superfamily conotoxin Mr3d       | P0C1N1 | (1) | -MSKIGVLLTICLLLFPLTAVPLDGDQADRPAERMQDNISSSEH--HPFF   |    |
| M-2-superfamily conotoxin Mr3g       | P0C1N5 | (1) | -MSKIGVLLTICLLLFALTAVPLDGDQADRPAERMQDNISSSER--HPMF   |    |
| Mu-conotoxin SIIIA                   | Q86DU6 | (1) | MMSKIGVLLTICPLLFPLTALPMDGDPADRPAERMQDNISSDE--HPLF    |    |
| M-3-superfamily conotoxin Tx3.5-a    | P0C1N7 | (1) | -MSKIGVLLTICLLLFPLTALPLDGDQPADQAAERLQAEQ-----HPLF    |    |
| M-3-superfamily conotoxin Mr3.5      | P0C1N4 | (1) | -MSKIGVLLTICLLLFPLTALPLDGDQPADQRAERTQAEK-----HSLP    |    |
| M-2-superfamily conotoxin Tx3c       | P58846 | (1) | -MFKIGVLLTICLLLFSLNVAVPLDGDQPADQPAERLDDISFEN--NPFY   |    |
| M-1-superfamily conotoxin 2          | Q9BPI0 | (1) | -MLKMGVLLFTFLVLFPLATLQLDADQPVVERYAENKQLLNTDERREIIS   |    |
| M-1-superfamily conotoxin Lt3.1      | Q2I2Q5 | (1) | -MLKMGVLLFTFLVLFPLTLELDTRPVERHAAIKQDLKPQERRGIRLH     |    |
| M-1-superfamily conotoxin Lt3.4      | Q2I2Q2 | (1) | -MLKMGVLLFTFLVLFPLAMFQLDADQPVVERYAENKQDLNDRERMKIMIS  |    |
| M-1-superfamily conotoxin Lt16.1     | Q2I2P8 | (1) | -MPKIGVSLFTFLVLFPLATLQLDGDQSAQGHQAQERGEDIFKMYQYLRRRA |    |
| M-1-superfamily conotoxin Lp3.1      | Q5I2P0 | (1) | -MLKMGVLLFTFLVLFPLTLELDTRPVERHAAIKQDLKPQERRGIRLH     |    |
| M-1-superfamily conotoxin Lp3.2      | Q5EHP4 | (1) | -MLKMGVLLFTFLVLFPLATLQLDADQPVVERYAENKQDLNPNERMKIMIS  |    |
| M-3-superfamily conotoxin TsMLKM-02  | Q9BPH4 | (1) | -MLKMGVLLFTFLVLFPLATLQLDADQPVVERYAENKQGLNPDESREIIS   |    |
| M-3-superfamily conotoxin TsMLKM-011 | Q9BH51 | (1) | -MLKMGVLLFTFLVLFPLATLQLDADQPVVERYAENKQLVSPYERRQIILH  |    |
| M-1-superfamily conotoxin Tx3.1      | P0C1N6 | (1) | -MLKMGVLLFTFLVLFPLATLQLDADQPVVERYAENKQLLNPDERREILP   |    |
| M-1-superfamily conotoxin Tx3a-a     | Q9BH73 | (1) | -MLKMGVLLFTFLVLFPLATLQLDADQPVVERYAENKQLLSPDERREIILH  |    |
| M-1-superfamily conotoxin Mr3e       | Q5EHP3 | (1) | -MLKMGVLLFTFLVLFPLATLQLDADQPVVERYAENKRLNPNDRERRGIRLH |    |
| M-1-superfamily conotoxin Mr3.8      | Q5EHP2 | (1) | -MLKMGVLLFTFLVLFPLATLQLDADQPVVERYAENKQLFNPHKRRGIRL   |    |
| M-1-superfamily conotoxin Lt3.2      | Q2I2Q4 | (1) | -MLKMGVLLFTFLVLFPLATLQLDADQPVVERYAENKQDLNPNERMKIMIS  |    |
| M-1-superfamily conotoxin Lt3.3      | Q2I2Q3 | (1) | -MLKIGVLLFTLLVLFPLATLQLDADQPVVERYAENKQDLNPNERMKIMIS  |    |
| Consensus                            |        | (1) | MSKIGVLL ICLLLFPLTALPLDGDQPADR AERMQD I E H L        |    |

|                                      |        |      |                                      |    |
|--------------------------------------|--------|------|--------------------------------------|----|
|                                      |        |      | -----                                |    |
|                                      |        |      | 51                                   | 86 |
| Kappa-M-conotoxin RIIIK              | P69769 | (48) | EKRLPSCCSLNRLRCPVPACKRNPCCGTG-----   |    |
| Mu-conotoxin GIIIA                   | P01523 | (48) | EKR-RDCCTP-PKKCKDRQCKPQRCCAGR-----   |    |
| Mu-conotoxin PIIIA                   | P58925 | (47) | EKRQLCCGF-PKSCRSRQCKPHRCCGR-----     |    |
| Psi-conotoxin PIIIE                  | P56529 | (48) | ERRHPPCCMY-GRCRRYPGCSASCCGG-----     |    |
| Psi-conotoxin PrIIIE                 | P0C7I1 | (48) | EKRAARCCTY-HGSLKEKERRKYCCGR-----     |    |
| M-2-superfamily conotoxin 3          | Q9BPJ7 | (48) | DAT-RRCNA-----GFCRFGCTPCCY-----      |    |
| M-2-superfamily conotoxin Tx3b       | P0C1N8 | (48) | DPN-KRCCPP-----VACNMGCKPCCG-----     |    |
| M-2-superfamily conotoxin TxMMSK-01  | Q9BPJ1 | (49) | DPV-KRCCRL-----LCLSCNPPCCG-----      |    |
| M-2-superfamily conotoxin Lt3.5      | Q2I2Q1 | (49) | DPV-KRCCKV-----QCESCTPCC-----        |    |
| M-2-superfamily conotoxin Mr3.3      | P0C1N2 | (48) | DVG-RECCGS-----FACRFGCVPCCV-----     |    |
| M-2-superfamily conotoxin Mr3.4      | P0C1N3 | (48) | DRS-RQCCHL-----PACRFGCTPCCW-----     |    |
| M-2-superfamily conotoxin Mr3d       | P0C1N1 | (48) | DPV-KRCCRL-----SCGLGCHPCCG-----      |    |
| M-2-superfamily conotoxin Mr3g       | P0C1N5 | (48) | DAV-RDCCPL-----PACPFGCNPPCCG-----    |    |
| Mu-conotoxin SIIIA                   | Q86DU6 | (49) | EKR-QNCCNG--GCSSKWRDHARCCGR-----     |    |
| M-3-superfamily conotoxin Tx3.5-a    | P0C1N7 | (44) | DQK-RRCCKF-----PCPDSCRYLCCG-----     |    |
| M-3-superfamily conotoxin Mr3.5      | P0C1N4 | (44) | DPR-MGCCPF-----PKTSTCTTLCCG-----     |    |
| M-2-superfamily conotoxin Tx3c       | P58846 | (48) | DPA-RRCCR-----TCFGCTPCCG-----        |    |
| M-1-superfamily conotoxin 2          | Q9BPI0 | (50) | ALRTVCCPFGGCHE-----LCQCCG-----       |    |
| M-1-superfamily conotoxin Lt3.1      | Q2I2Q5 | (50) | APR-DECCPEQWCDG-----ACDCCS-----      |    |
| M-1-superfamily conotoxin Lt3.4      | Q2I2Q2 | (50) | ALRQVCCDWEWCDE-----LCSCCW-----       |    |
| M-1-superfamily conotoxin Lt16.1     | Q2I2P8 | (50) | LER--RRTGEDFLEECMGGCAFDFCCKRSLRDTTSD |    |
| M-1-superfamily conotoxin Lp3.1      | Q5I2P0 | (50) | APR-DECCPEQWCDG-----ACDCCS-----      |    |
| M-1-superfamily conotoxin Lp3.2      | Q5EHP4 | (50) | ALGQVRCCLISPACHE-----ECYCCQ-----     |    |
| M-3-superfamily conotoxin TsMLKM-02  | Q9BPH4 | (50) | ALRQVDCCEQWCDG-----GCDCCQ-----       |    |
| M-3-superfamily conotoxin TsMLKM-011 | Q9BH51 | (50) | ALGQVCCDQWCDG-----ACDCCA-----        |    |
| M-1-superfamily conotoxin Tx3.1      | P0C1N6 | (50) | ALRKFCDSNWCHIS-----DCECCY-----       |    |
| M-1-superfamily conotoxin Tx3a-a     | Q9BH73 | (50) | ALGTVCCSWDVCDDHP-----SCTCCG-----     |    |
| M-1-superfamily conotoxin Mr3e       | Q5EHP3 | (50) | ALGQVCCPFGGCHE-----LCYCCD-----       |    |
| M-1-superfamily conotoxin Mr3.8      | Q5EHP2 | (50) | APGKRCCHWNWCDH-----LCSCCGS-----      |    |
| M-1-superfamily conotoxin Lt3.2      | Q2I2Q4 | (50) | ALGQVRCCLISPACHE-----ECYCCQ-----     |    |
| M-1-superfamily conotoxin Lt3.3      | Q2I2Q3 | (50) | ALGQVRCCLISPACHE-----ECYCC-----      |    |
| Consensus                            |        | (51) | D R CC CC                            |    |

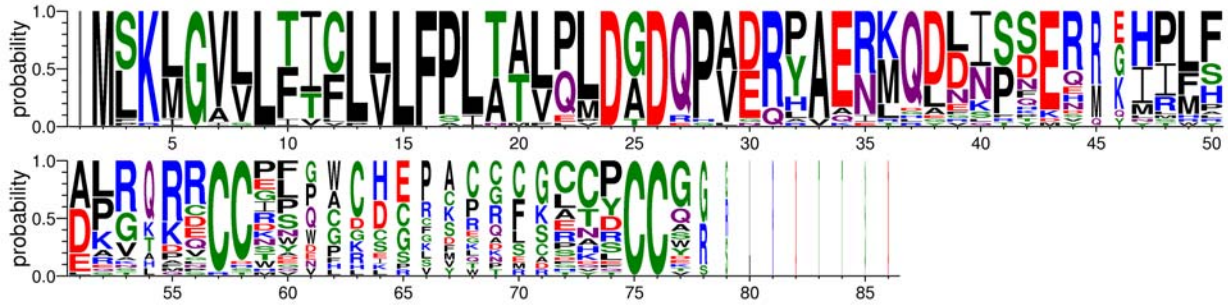

This family has moderately conserved leader peptides including a highly conserved Pro at position 28. Several Asp/Glu residues are also highly conserved. A subset of family members also contain a (Lys/Arg)Arg protease cleavage site to remove the leader peptide (position 55-56, see individual alignments) as well as several prolines at other positions (see alignments).



***g. A-Superfamily***

|                                      |     | -----signal----- -----leader peptide-----           |
|--------------------------------------|-----|-----------------------------------------------------|
|                                      | 1   | 50                                                  |
| alpha-A-conotoxin Tx1 AAD31912       | (1) | MGMRMMVVFLLVVLASTVVSSTSGRAFHGRNAAA--KASGLVSLTDRR    |
| alpha-A-conotoxin Tx2 AAD31913       | (1) | MGMRMMFTVFLVVLATTVVSFTSGRRTFHGRNAAA--KASGLVSLTDRR   |
| alpha-conotoxin Acl.1a ABD33847      | (1) | MGMRMMFTVFLVVLATTVVSYPSSASD-GRDDEAKDERSDMYESKRN-    |
| alpha-conotoxin Acl.1a ABD48789      | (1) | MGMRMMFTLFLVVLATTVVSYPSSASD-GRDDEAKDERSDMYELKRN-    |
| Alpha-conotoxin Acl.1a P0CAQ4        | (1) | MGMRMMFTLFLVVLATTVVSYPSSASD-GRDDEAKDERSDMYELKRN-    |
| Alpha-conotoxin Acl.1b P0CAQ5        | (1) | MGMRMMFTLFLVVLATTVVSFPSSASD-GRDDEAKDERSDMYKSKRN-    |
| Alpha-conotoxin Bn1.1/Bn1.2 P0C1Y1   | (1) | MGMRMMFTMFLVVLATTVVSFAASDR-ASDGRNAAAKDASDLVALT--V   |
| Alpha-conotoxin Bn1.3 P0C1Y2         | (1) | MGMRMMFTVFLVVLATVAVLPVLLDR-ASDGRNAAANAKTPRIAPFIR-   |
| Alpha-conotoxin Ca1.1 P0C1V9         | (1) | MGMRMMFTVFLVVLATTVVSFTSDR-ASDGRNAAA--NAFDLIAIAR-    |
| Alpha-conotoxin Ca1.2 P0C1W0         | (1) | MGMRMMFTVFLVVLATTVVSFTSDR-ASEGRNAAAKDASDLVALT--V    |
| Alpha-conotoxin ImIIA Q9U619         | (1) | MGMRMMFTMFLVVLATVAVLPVLLDR-ASDGRNAAANAKTPRIAPFIR-   |
| alpha-conotoxin Lp1.1 ABC39769       | (1) | MGMRMMFTMFLVVLATTVDTFTSDH-ALDAMNAASNKASRIIALA--V    |
| Alpha-conotoxin Lp1.1 Q6PTD5         | (1) | MGMRMMFTMFLVVLATTVDTFTSDR-ALDAMNAASNKASRIIALA--V    |
| alpha-conotoxin lpl.2 AAS93425       | (1) | MGMRMMFTVFLVVLATTVVSFTSDR-AFDGRNAAASDKASDLISLA--V   |
| alpha-conotoxin lpl.3 AAS93426       | (1) | MGMRMMFTMFLVVLATTVVSFTSDR-ASDGRNAAA--KALDLIAATAR-   |
| Alpha-conotoxin Lp1.4 A1X8B6         | (1) | MGMRMMSIMFMLVVLATTVVSFTSDR-ALDAMNAASKKASRIIALA--V   |
| alpha-conotoxin lpl.4 AAS93427       | (1) | MGMRMMFTMFLVVLATTVVSFTSDR-ALDAMNAASKKASRIIALA--V    |
| alpha-conotoxin Lp1.4 ABD33848       | (1) | MGMRMMSIMFMLVVLATTVVSFTSDR-ALDAMNAASKKASRIIALA--V   |
| alpha-conotoxin Lp1.5 AAS99934       | (1) | MGMRMMFTVFLVVLASTVTLDRASN----GMNAAIRKASALVAQIAYR    |
| Alpha-conotoxin Lp1.6a P0CAQ6        | (1) | MGMRMMFTMFLVVLATTVVSFTSGR-ASDGRNAPANNKVSDLIR----    |
| Alpha-conotoxin Lp1.7 A1X8C2         | (1) | MGMRMMFTMFLVVLATTVVSFNSDRE-----SNHENRRTSNQITRGMV    |
| Alpha-conotoxin Lp1.8 A1X8C3         | (1) | MGMRMMFTMFLVVLATTVVSFNSDRE-----SNHENRRTSNQITRGMV    |
| Alpha-conotoxin Lt1.1 Q2I2R8         | (1) | MGMRMMFTMFLVVLATTVDTFTSDR-ALDAMNAASNKASRIIALA--V    |
| Alpha-conotoxin Lt1.2 Q2I2R7         | (1) | MGMRMMFTMFLVVLATTVDTFTSDR-ALDAMNAASNKASRIIALA--V    |
| Alpha-conotoxin Lt1.3 Q2I2R6         | (1) | MGMRMMFTMFLVVLATTVVSFNLDRE-----SNHENRRTSNQITRGMV    |
| alpha-conotoxin Mil.1 AAS99935       | (1) | MGMRMMFTVFLVVLATTVVSFTSDR-GSDGRNAAAKDASDLVALT--V    |
| Alpha-conotoxin MII P56636           | (1) | MGMRMMFTVFLVVLATTVVSFPSSDR-ASDGRNAAANDKASDLVITLA--L |
| alpha-conotoxin Mr1.1 AAS93428       | (1) | MGMRMMFTVFLVVLATTVVSFTSDR-ASDGRKAAAADKASDLVALT--V   |
| Alpha-conotoxin Mr1.1 Q6PTD1         | (1) | MGMRMMFTVFLVVLATTVVSFTSDR-ASDGRKAAAADKASDLVALT--V   |
| Alpha-conotoxin Mr1.2 A6M934         | (1) | MGMRMMFTVFLVVLATTVVSFTSDR-GSDGRNAAAKDASDLVALT--V    |
| alpha-conotoxin Mr1.2 ABC39767       | (1) | MGMRMMFTMCLVVLATTVISFTSDR-ASNGRNAAAKDASDLNALN--V    |
| Alpha-conotoxin Mr1.3 A0SE59         | (1) | MGMRMMFTMCLVVLATTVISFTSDR-ASNGRNAAAKDASDLNALN--V    |
| Alpha-conotoxin PnIB P50985          | (1) | MGMRMMFTVFLVVLATTVVSFTSDR-ASDDG----NAAASDLIALT--I   |
| Alpha-conotoxin Pu1.1 A0SE60         | (1) | MGMRMMFTVFLVVLATTVVSFTSDR-TSDGRNAAF--NAFDLIAIAR-    |
| Alpha-conotoxin Pu14.1 ACL13206      | (1) | MGMRMMFTVFLVVLATTVVSFNSDR-ASDGRNAAANVKASDLMARVLR--  |
| Alpha-conotoxin Pu14.2 ACL13207      | (1) | MGMRMMFTVFLVVLATTVDSFNSDR-ASDGRDDEAEVSTESDVIIVTCEP- |
| alpha-conotoxin Qc alphaL-2 A1X8B9   | (1) | MGMRMMFTMFLVVLATTVVSFNLDH-AFDGRNAAANNKATDLMARVLR--  |
| alpha-conotoxin qc1.1 AAS93422       | (1) | MGMRMMFTMFLVVLATTVVSFTSDH-ASDGRNTAANDKASNLMLARD--   |
| alpha-conotoxin Qc1.1a ABD33852      | (1) | MGMRMMFTMFLVVLATTVVSFTSDH-ASDGRNTAANDKASNLMLARD--   |
| Alpha-conotoxin Qc1.1a Q6PTD7        | (1) | MGMRMMFTMFLVVLATTVVSFTSDH-ASDGRNTAANDKASNLMLARD--   |
| alpha-conotoxin Qc1.1b ABD33853      | (1) | MGMRMMFTMFLVVLATTVVSFTSDH-ASDGRNTAANDKASNLMLARN--   |
| Alpha-conotoxin Qc1.1b Q6PPB3        | (1) | MGMRMMFTMFLVVLATTVVSFTSDH-ASDGRNTAANDKASNLMLARN--   |
| alpha-conotoxin qc1.2 AAS93423       | (1) | MGMRMMFTVFLVVALATTVASFTLDR-ASNGRNAAADDKPSDWIALA--I  |
| Alpha-conotoxin Qc1.2 Q6PTD6         | (1) | MGMRMMFTVFLVVALATTVASFTLDR-ASNGRNAAADDKPSDWIALA--I  |
| alpha-conotoxin Qc1.3 AAS99932       | (1) | MGMRMMFTMFLVVLATTVVSFTSDH-ASDGRNTAANDKASNLMLARN--   |
| alpha-conotoxin QcaL-1 ABD33850      | (1) | MGMRMMFTMFLVVLATTVVSINLDH-AFDGRNAAANNKATDLMARVLR--  |
| alpha-conotoxin QcaL-2 ABD33851      | (1) | MGMRMMFTMFLVVLATTVVSINLDH-AFDGRNAAANNKATDLMARVLR--  |
| Alpha-conotoxin S1 P15471            | (1) | MGMRMMFTVFLVVLATTVVSFPSSDR-ASDGRDDEAKDERSDMHESDR--  |
| Alpha-conotoxin S1.1 P0C1W4          | (1) | MGMRMMFTVFLVVLATTVVSFPSSDR-ASDGRDDEAKDERSDMHESDR--  |
| Alpha-conotoxin S2 P28879            | (1) | MGMRMMFTVFLVVLATTVVSFPSSDR-ASDGRDDEAKDERSDMHESDRNG  |
| alpha-conotoxin SII AAN77902         | (1) | MGMRMMFTVFLVVLATTVVSFPSSDR-ASDGRDDEAKDERSDMHESDRNG  |
| Alpha-conotoxin SrIA/SrIB P85886     | (1) | MGMRMMFTVFLVVLATTVVSFTSDS-AFDSRNVAANDKVSDMIALTAR-   |
| Alpha-conotoxin Tx1 Q9XZK6           | (1) | MGMRMMVVFLLVVLASTVVSSTSGRAFHGRNAAA--KASGLVSLTDRR    |
| Alpha-conotoxin Tx2 Q9XZK7           | (1) | MGMRMMFTVFLVVLATTVVSFTSGRRTFHGRNAAA--KASGLVSLTDRR   |
| Alpha-conotoxin Vc1A P69747          | (1) | MGMRMMFTVFLVVLATTVVSSTSGRREFRGRNAAA--KASDLVSLTDDK   |
| conotoxin Act1.1b ABD48790           | (1) | MGMRMMFTLFLVVLATTVVSFPSSASD-GRDDEAKDERSDMYKSKRN-    |
| conotoxin ImIIA AAF12824             | (1) | MGMRMMFTVFLVVLATVAVLPVLLDR-ASDGRNAAANAKTPRIAPFIR-   |
| conotoxin Mr1.2 ABD48791             | (1) | MGMRMMFTVFLVVLATTVVSFTSDR-GSDGRNAAAKDASDLVALT--V    |
| Kappa-A-conotoxin MIVA P0C1X1        | (1) | MGMRMMFTVFLVVLATTVVSIPSSDR-ASDGRNAVHERAPELVVAT--    |
| Kappa-A-conotoxin S4.2 P0C829        | (1) | MGMRMMFTVFLVVLATTVVSTPSSDR-ASDGRNAVHERQKELVPSVI--   |
| Kappa-A-conotoxin SIVA P0C828        | (1) | MGMRMMFTVFLVVLATTVVSTPSSDR-ASDGRNAVHERQKELVPSVI--   |
| Kappa-A-conotoxin SmIVA/SmIVB P0C1Y3 | (1) | MGMRMMFTVFLVVLATTVVSIPSSDR-ASDGRNAVNERQTLVPSVI--    |
| Pu1.1 ABC39768                       | (1) | MGMRMMFTVFLVVLATTVVSFTSDR-TSDGRNAAF--NAFDLIAIAR-    |
| Consensus                            | (1) | MGMRMMFTVFLVVLATTVVSFTSDR ASDGRNAAA KASDL AL        |



```

alpha-A-conotoxin Tx1 AAD31912 (49) PECCSDPFRCNSSHPPELGGRR-----
alpha-A-conotoxin Tx2 AAD31913 (49) PECCSHFACNVDPHEIQR-----
alpha-conotoxin Acl.1a ABD33847 (49) -GRCCHFACGKHFSCGR-----
alpha-conotoxin Acl.1a ABD48789 (49) -GRCCHFACGKHFNCGR-----
Alpha-conotoxin Acl.1a P0CAQ4 (49) -GRCCHFACGKHFNCGR-----
Alpha-conotoxin Acl.1b P0CAQ5 (49) -GRCCHFACGKHFSCGR-----
Alpha-conotoxin Bn1.1/Bn1.2 P0C1Y1 (48) KGCCSHFACSVNNDPICG-----
Alpha-conotoxin Bn1.3 P0C1Y2 (49) DYCCHRGFPCMVWCG-----
Alpha-conotoxin Cal.1 P0C1V9 (47) QNCCSIFSCWEKYKCS-----
Alpha-conotoxin Cal.2 P0C1W0 (48) RGCCAIREFRLQNAAYCGGIY-----
Alpha-conotoxin ImIIA Q9U619 (49) DYCCHRGFPCMVWCG-----
alpha-conotoxin Lp1.1 ABC39769 (48) RGCCARAACAGIHQELGGRR-----
Alpha-conotoxin Lp1.1 Q6PTD5 (48) RGCCARAACAGIHQELGGGR-----
alpha-conotoxin Lp1.2 AAS93425 (48) RGCCSHFACSVNNDPIYFGGKR-----
alpha-conotoxin Lp1.3 AAS93426 (47) PRCCSNFACGAGHPEIAGRR-----
Alpha-conotoxin Lp1.4 A1X8B6 (48) RGCCSHFACSGNHQELDGRR-----
alpha-conotoxin Lp1.4 AAS93427 (48) RGCCSHFACSGNHQELDGRR-----
alpha-conotoxin Lp1.4 ABD33848 (48) RGCCSHFACSGNHQELDGRR-----
alpha-conotoxin Lp1.5 AAS99934 (47) -DCCDDFACTVNNPGLCT-----
Alpha-conotoxin Lp1.6a P0CAQ6 (45) QFCCGHYCDFIPNVCG-----
Alpha-conotoxin Lp1.7 A1X8C2 (45) DECCCKDPCQRQNMQHCPAR-----
Alpha-conotoxin Lp1.8 A1X8C3 (45) DECCDDPCQRQNMMEHCPAS-----
Alpha-conotoxin Lt1.1 Q2I2R8 (48) RGCCARAACAGIHQELGGGR-----
Alpha-conotoxin Lt1.2 Q2I2R7 (48) RGCCARAACAGIHQELGGRR-----
Alpha-conotoxin Lt1.3 Q2I2R6 (45) DECCDDPCQRQNMMEHCPAS-----
alpha-conotoxin Mil.1 AAS99935 (48) KGCCSNFPCYANNQAYNGRR-----
Alpha-conotoxin MII P56636 (48) KGCCSNFVCHLEHSNLGRRR-----
alpha-conotoxin Mr1.1 AAS93428 (48) KGCCSHFACSVNNDPICG-----
Alpha-conotoxin Mr1.1 Q6PTD1 (48) KGCCSHFACSVNNDPICG-----
Alpha-conotoxin Mr1.2 A6M934 (48) KGCCSNFPCYANNQAYNGRR-----
alpha-conotoxin Mr1.2 ABC39767 (48) RGCCSHFACRVHYPHVYGRR-----
Alpha-conotoxin Mr1.3 A0SE59 (48) RGCCSHFACRVHYPHVYGRR-----
Alpha-conotoxin PnIB P50985 (44) KGCCSLFPCALSNPDYCG-----
Alpha-conotoxin Pu1.1 A0SE60 (47) QNCCNVFGCWAKYKHLGGRK-----
Alpha-conotoxin Pu1.1 ACL13206 (48) EKDCPPHPVPGMHKCVLKTCT-----
Alpha-conotoxin Pu1.2 ACL13207 (49) ---CMNPFACGPNYKCR-----
alpha-conotoxin Qc alphaL-2 A1X8B9 (49) -GFCSDPSCRFGNPELDWRR-----
alpha-conotoxin qcl.1 AAS93422 (48) -ECCPDPFCKASNPDLDWRS-----
alpha-conotoxin Qcl.1a ABD33852 (48) -ECCPDPFCKASNPDLDWRS-----
Alpha-conotoxin Qcl.1a Q6PTD7 (48) -ECCPDPFCKASNPDLDWRS-----
alpha-conotoxin Qcl.1b ABD33853 (48) -ECCDNFPCKSSNPDLDWRS-----
Alpha-conotoxin Qcl.1b Q6PPB3 (48) -ECCDNFPCKSSNPDLDWRS-----
alpha-conotoxin qcl.2 AAS93423 (48) KQCCANFPCKHVN---CR-----
Alpha-conotoxin Qcl.2 Q6PTD6 (48) KQCCANFPCKHVN---CR-----
alpha-conotoxin Qcl.3 AAS99932 (48) -ECCDNFPCKSSNPDLDWRS-----
alpha-conotoxin Qcal-1 ABD33850 (49) -RFCCSDPFCRISNPESGWEP-----
alpha-conotoxin Qcal-2 ABD33851 (49) -GFCSDPSCRFGNPELDWRR-----
Alpha-conotoxin S1 P15471 (48) KEICCNFACGPKYSCGR-----
Alpha-conotoxin S1.1 P0C1W4 (49) -GCCRNFACESHRCG-----
Alpha-conotoxin S2 P28879 (50) RGCCCNFACGPNYCGGTSCSRTL-----
alpha-conotoxin SII AAN77902 (50) RGCCCNFACGPNYCGGTSCSRTI-----
Alpha-conotoxin SrIA/SrIB P85886 (49) RTCCSRFTCRMEYPELGGRR-----
Alpha-conotoxin Tx1 Q9XZK6 (49) PECCSDPFRCNSSHPPELGGRR-----
Alpha-conotoxin Tx2 Q9XZK7 (49) PECCSHFACNVDPHEIQR-----
Alpha-conotoxin Vc1A P69747 (49) RGCCSDPFRNYDPHEICG-----
conotoxin Act1.1b ABD48790 (49) -GRCCHFACGKHFSCGR-----
conotoxin ImIIA AAF12824 (49) DYCCHRGFPCMVWCG-----
conotoxin Mr1.2 ABD48791 (48) KGCCSNFPCYANNQAYNGRR-----
Kappa-A-conotoxin MIVA P0C1X1 (48) TNCCGYNPMTICPPCMCTYSCPPK-RKPGRRND
Kappa-A-conotoxin S4.2 P0C829 (48) TTCCGYDPGTMCPPCRCTNSCPTKPKPGRRND
Kappa-A-conotoxin SIVA P0C828 (48) TTCCGYDPGTMCPPCRCTNSCG-----
Kappa-A-conotoxin SmIVA/SmIVB P0C1Y3 (48) TTCCGYDPGTMCPTCMCTNTCKPKPKSGRRND
Kappa-A-conotoxin Pu1.1 ABC39768 (47) QNCCNVFGCWAKYKHLGGRK-----
Consensus (51) CC P C C

```

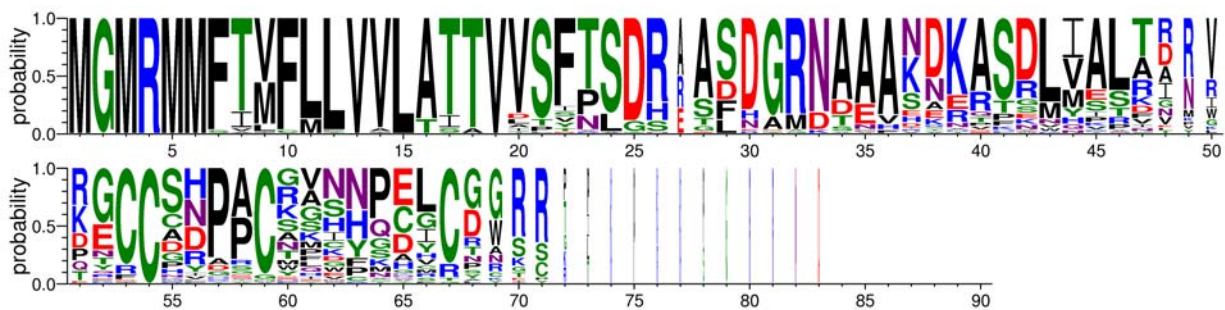

### h. S-Superfamily

|                                      |           |                                                      |                                                     |
|--------------------------------------|-----------|------------------------------------------------------|-----------------------------------------------------|
|                                      |           | -----signal----- -----leader peptide-----            |                                                     |
|                                      |           | 1                                                    | 50                                                  |
| S-superfamily conotoxin Tx8.1 B2CI27 | (1)       | --LKMGMAMFVLLLLLFTLASSHREGDIQARKTHLKSDFYRLLPRFARGCTI |                                                     |
| S-superfamily conotoxin Ac8.1 B2CI28 | (1)       | --LKMGMAMFVLLLLLFTLASSQEGDVQARKTSLKSDFYRALRQYDRQCTL  |                                                     |
| S-superfamily conotoxin Ca8.1 B0L0Y5 | (1)       | MMLKMGAMFVLLLLLFTLFPSSQEGDVQARKTHLKRGFYGTLAMSTRGCSG  |                                                     |
| S-superfamily conotoxin Ca8.2 B1PZN6 | (1)       | MMLKMGAMFVLLLLLFTLFPSSQEGDVQARKTHLKRGFYGTLAMSTRGCSG  |                                                     |
| S-superfamily conotoxin Ca8.3 B2CJ87 | (1)       | MMLKMGAMFVLLLLLFTLFPSSQEGDVQARKTHLKRGFYGTLAMSTRGCSG  |                                                     |
| S-superfamily conotoxin ABQ00572     | (1)       | MMLKMGAMFVLLLLLFTLFPSSQEGDVQARKTHLKRGFYGTLAMSTRGCSG  |                                                     |
|                                      | Consensus | (1)                                                  | MMLKMGAMFVLLLLLFTLFPSSQEGDVQARKTHLKRGFYGTLAMSTRGCSG |
|                                      |           | 51                                                   | 95                                                  |
| S-superfamily conotoxin Tx8.1 B2CI27 | (49)      | S---CGYEDNRQGECHCPGKINCYCTSGHINKGCQCAC-----          |                                                     |
| S-superfamily conotoxin Ac8.1 B2CI28 | (49)      | VNNCDRNGFRACNGDCSCEG-QICQYRVSPGSGGACTCRNAK           |                                                     |
| S-superfamily conotoxin Ca8.1 B0L0Y5 | (51)      | T---CHRREDGKCRGTCDSCGYSYCRCGDAHFFYR-GCTCTC----       |                                                     |
| S-superfamily conotoxin Ca8.2 B1PZN6 | (51)      | T---CHRREDGKCRGTCDSCGYSYCRCGDAHFFYR-GCTCTCQG--       |                                                     |
| S-superfamily conotoxin Ca8.3 B2CJ87 | (51)      | T---CRRHREDGKCRGTCDSCGYSYCRCGDAHFFYR-GCTCTC----      |                                                     |
| S-superfamily conotoxin ABQ00572     | (51)      | T---CHRREDGKCRGTCDSCGYSYCRCGDAHFFYR-GCTCTC----       |                                                     |
|                                      | Consensus | (51)                                                 | T---CHRREDGKCRGTCDSCGYSYCRCGDAHFFYR-GCTCTC----      |

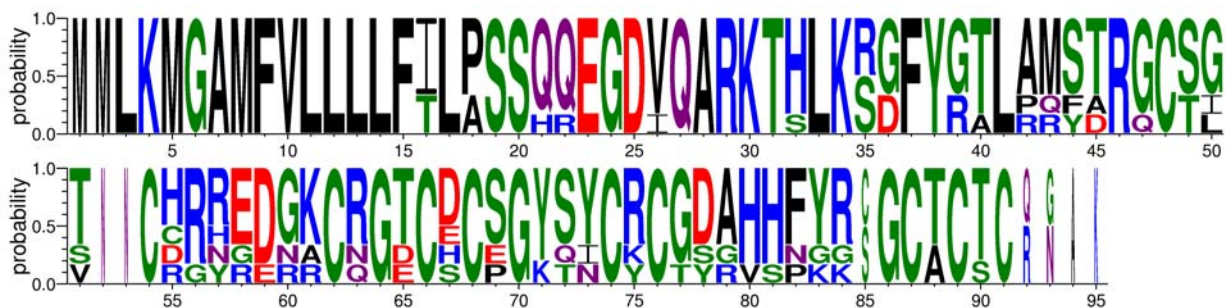

The leader peptides for this presently small family (in terms of full sequence information) have several conserved charged amino acids.

*i. T-Superfamily*

|                                         |     | -----signal----- ---leader peptide----             |      |
|-----------------------------------------|-----|----------------------------------------------------|------|
|                                         | 1   |                                                    | 50   |
| T-1 conotoxin 3 Q3YEH7                  | (1) | MRCLEVFVILLLLLIASVPSDAVQLKTK-DDMPLPSFNG--NARR--    | TPRM |
| T-1 conotoxin Gm5.1 Q9U6Z9              | (1) | MRYLEVFVILLLLLIASIPSDTVQLKTK-DDMPLASFHG--NGRR--    | ILRM |
| T-1 conotoxin Tx-D0111 Q9BPG7           | (1) | MRCLEVFVILLLLLIASIPSDTVPLKTK-DDMQASFGH--NARR--     | TLQM |
| T-1 conotoxin TxXIIIA Q9BPH1            | (1) | MRCLEVFVILLLLLIASVPSVDAELKAK-DDMQASFH--DNAER--     | DQOK |
| T-1 conotoxin Mr5.1a Q6PN86             | (1) | MRCVVFVILLLLLIASAPSVDAELKTK-DDMPLPSSHA--NIKR--     | TLQI |
| T-1 conotoxin Mr5.1b Q6PN85             | (1) | MRCVVFVILLLLLIASAPSVDAELKTK-DDMPLPSSHA--NIKR--     | TLQM |
| T-1 conotoxin Mr5.2 Q6PN84              | (1) | MRCVVFVILLLLLIASAPVDAQLKTK-DDMPLASFHA--NVKR--      | TLQI |
| T-1 conotoxin Mr5.3 Q6PN83              | (1) | MRCVVFVILLLLLIASVPSVDAQLKTK-DDMPLASSHA--NVKR--     | TLQI |
| T-1 conotoxin Mr5.4a Q6PN82             | (1) | MRCVVFVILLLLLIASAPSVDAVQLKTK-DDVPLASFHA--NVKR--    | TLQI |
| T-1 conotoxin Pn-B0151 Q9BPG0           | (1) | MRCLEVFVILLLLLIASIPSDALQKTK-DDMPLASFH--DNVKR--     | ILQT |
| T-1 conotoxin Pu5.3 P0C638              | (1) | MRCVVFVILLLLLIASIPSDATQKTK-DDMSLASFH--DNAKR--      | ILQT |
| T-1 conotoxin Pu5.4 P0C639              | (1) | MRCVVFVILLLLLIASIPSDATQKTK-DDMSLASFH--DNAKR--      | FLQT |
| T-1 conotoxin Pu5.1 P0C636              | (1) | MRCVVFVILLLLLIASIPSDARLNPK-DDVPLASFH--EDANG--      | ILQM |
| T-1 conotoxin Pu5.2 P0C637              | (1) | MRCVVFVILLLLLIASIPSDARLNPK-DDVPLASFHGADNANR--      | ILRT |
| T-1 conotoxin Ts-011 Q9BH75             | (1) | MHCLEFVILLLLLIASIPSDARPKTK-DDVPLASFHGADNANR--      | ILRT |
| T-1 conotoxin Ca5.1 P0C666              | (1) | MRCVVFVILLLLLIASIPASDPLEKTIQSLLIRALEADATKNDPRILEDI |      |
| T-1 conotoxin Lp5.2 Q6PN80              | (1) | MRCVVFVILLLLLIASIPAPKSLETRIQNDLIRALTDADLKTEGFLSGL  |      |
| T-superfamily conotoxin Lt5b ABC70191   | (1) | MCLCLEFVILLLLLIASIPAPKSLETRIQNDLIRALTDADLKTEGFLSGL |      |
| T-superfamily conotoxin Lt5g ABC70194   | (1) | MCLCLEFVILLLLLIASIPAPKSLETRIQNDLIRALTDADLKTEGFLSGL |      |
| T-superfamily conotoxin Lt5f ABC70192   | (1) | MCLCLEFVILLLLLIASIPAPKSLETRIQNDLIRALTDADLKTEGFLSGL |      |
| T-superfamily conotoxin Lt5j ABC70199   | (1) | MCLCLEFVILLLLLIASIPAPKSLETRIQNDLIRALTDADLKTEGFLSGL |      |
| T-superfamily conotoxin Lt5k ABC70198   | (1) | MCLCLEFVILLLLLIASIPAPKSLETRIQNDLIRALTDADLKTEGFLSGL |      |
| T-superfamily conotoxin Lt5i ABC70193   | (1) | MCLCLEFVILLLLLIASIPAPKSFETKVSQDLTRTDGNMTEENLNG---- |      |
| T-1 conotoxin Im5.1 Q9U6Z5              | (1) | MYCLEFVILLLLLIASIPSPTPPQPRNK-DRVHLISLLD--NHKQ--    | ILQR |
| T-1 conotoxin LeDr192 Q3YEH1            | (1) | MRCFVFVILLLLLIASAPCFDARTKTD-DDVPLSPLRD--NLKR--     | TTRT |
| T-1 conotoxin TxIX P81755               | (1) | MRCFVFVILLLLLIASAPCFDARTKTD-DDVPLSSLRD--NLKR--     | TTRT |
| T-1 conotoxin Pn-B02 Q9BPG8             | (1) | MRCLEFVILLLLLIASAPFDALPKTE-DNVPLSSFHD--NLKR--      | TRRI |
| T-1 conotoxin Pu-0111 Q9BPF4            | (1) | MRCLEFVILLLLLIASAPGFDPKTE-DDVPLSSFHD--DLQR--       | TVRT |
| T-2 conotoxin MrIA P58808               | (1) | MRCLEFVILLLLLIASAPGVVLPKTE-DDVPLSSVYG--NGKS--      | ILRG |
| T-1 conotoxin Ca5.3 P0C668              | (1) | MRCVVFVILLLLLIASAPGVDAQPKTK-YNAPLISLHDNAKQ-----    | IL   |
| T-1 conotoxin Pu5.6 P0C641              | (1) | MRCVVFVILLLLLIASAPSTDAQKTK-DDAPLISLNDNA-----       | L    |
| T-1 conotoxin Leo-T1 P0C906             | (1) | MRCLEFVILLLLLIASAPSVDAQPKTE-DDVPLASLHDNAKL-----    | TL   |
| T-1 conotoxin Gm5.2 Q9U6Z8              | (1) | MRCLEFVILLLLLIASAPSVDAQPKTK-DDVPLAPLHDNIR-----     | T    |
| T-1 conotoxin TeAr151 Q3YEE9            | (1) | MRCLEFVILLLLLIASAPSVDAQPKTK-DDVPLAPLHDNIR-----     | T    |
| T-1 conotoxin Tx5.1 Q9U700              | (1) | MCCLEFVILLLLLIASAPSVDAQPKTK-DDVPLAPLHDNAKS-----    | A    |
| T-1 conotoxin Leo-T2 P0C907             | (1) | MRCLEFVILLPLIPSPSVDAQPMTE-DDVPLASFHE--QLTQ--       | ELWN |
| T-1 conotoxin TauMi Q6PTD0              | (1) | MRCVVFVILLLLLIASAPSVDAQPLTR-DDVPLASFLD--DARR--     | TTRS |
| T-1 conotoxin ViVA P0C2B0               | (1) | MRCVVFVILLLLLIASAPAAVQPKTEKDDVPLASVHD--SALR--      | ILS- |
| T-1 conotoxin ViVB P0C2B1               | (1) | MRCVVFVILLLLLIASAPAAVQPKTEKDDVPLASVHD--SALR--      | ILS- |
| T-superfamily conotoxin Sr5.1 ACN22840  | (1) | MRCLEFVILLLLLIASAPSVDAQLKTK-DDVPLASFH--DNAKG--     | TQHK |
| T-superfamily conotoxin Sr5.2 ACN22841  | (1) | MRCLEFVILLLLLIASAPSVDAQLKTK-DDVPLASFH--DNAKG--     | TQHK |
| T-superfamily conotoxin Sr5.3 ACN22842  | (1) | MRCLEFVILLLLLIASAPSVDAQLKTK-DDVPLASFH--DNAKG--     | TQHK |
| T-superfamily conotoxin Sr5.5 ACN22844  | (1) | MRCLEFVILLLLLIASAPSVDAQLKTK-DDVPLASFH--DNAKG--     | TQHK |
| T-superfamily conotoxin Sr5.6 ACN22845  | (1) | MRCLEFVILLLLLIASAPSVDAQLKTK-DDVPLTSVH--DNAKG--     | TQHR |
| T-superfamily conotoxin Sr5.7 ACN22846  | (1) | MRCLEFVILLLLLIASAPSVDAQLKTK-DDVPLASFH--DNAKG--     | TQHK |
| T-superfamily conotoxin Sr5.8 ACN22847  | (1) | MRCLEFVILLLLLIASAPSVDAQLKTK-DDVPLASFH--DNAKG--     | TQHR |
| T-1 conotoxin LiC121 Q3YEG9             | (1) | MRCVVFVILLLLLIASAPSVDAHPKTK-DDVPLASFHD--DAKR--     | TLQR |
| T-1 conotoxin LiC33 Q3YEH4              | (1) | MRCVVFVILLLLLIASAPSVDAHPKTK-DDVPLASFHD--DAKR--     | TLQR |
| T-1 conotoxin LiC32 Q3YEH5              | (1) | MRCVVFVILLLLLIASAPSVDAHPKTK-DDVPLASFHD--DAKR--     | TLQR |
| T-1 conotoxin Ts-03 Q9BPF6              | (1) | MRCLEFVILLLLLIASAPAAVQPKTK-DDVPLASFHD--NAKR--      | TLQR |
| T-1 conotoxin Vi5.1a P0C669             | (1) | MRCVVFVILLLLLIASAPSVDAHPKTK-DDVPLASFHD--NAER--     | TLQR |
| T-1 conotoxin Vi5.1b P0C670             | (1) | MRCVVFVILLLLLIASAPSVDAHPKTK-DDVPLASFHD--NAER--     | TLQR |
| T-1 conotoxin Lp5.1 Q6PN81              | (1) | MRCVVFVILLLLLIASAPSVDAQRKTK-DDVPLASFHD--NAKR--     | TLKR |
| T-superfamily conotoxin Lt5a ABC70187   | (1) | MRCVVFVILLLLLIASAPSVDAQRKTK-DDVPLASFHD--NAKR--     | TLKR |
| T-superfamily conotoxin Lt5c ABC70188   | (1) | MRCLEFVILLLLLIASAPSVDAQPMTK-DDVPLSSLHD--NAKR--     | ALQM |
| T-superfamily conotoxin Lt5d ABC70189   | (1) | MRCLEFVILLLLLIASAPSVDAQPMTK-DDVPLASLHD--NAKR--     | ALQM |
| T-superfamily conotoxin Lt5e ABC70190   | (1) | MRCLEFVILLLLLIASAPSVDAQRKTK-DDVPLASFHD--NAKR--     | TLKR |
| T-superfamily conotoxin Lt5d-1 ABC70196 | (1) | MRCLEFVILLLLLIASAPSVDAQPMTK-DDVPLASLHD--NAKR--     | ALQM |
| T-superfamily conotoxin Lt5d-2 ABC70197 | (1) | MRCLEFVILLLLLIASAPSVDAQPMTK-DDVPLASLHD--NAKR--     | ALQM |
| T-1 conotoxin p5a Q9U6Z6                | (1) | MRCLEFVILLLLLIASAPCVDAHPKTK-DDMPLASFHD--NAKG--     | TLQR |
| T-1 conotoxin BeB34 Q3YEH6              | (1) | MRCLEFVILLLLLIASAPSVDAQRKTK-ADVPLISLND--NAKR--     | TLQI |
| T-1 conotoxin Pn-B01121 Q9BPF3          | (1) | MCCLEFVILLLLLIASAPSVDAQLPKTK-DDMSLASFHD--NAKR--    | TLQI |
| T-1 conotoxin Pu-B01122 Q9BPF1          | (1) | MRCLEFVILLLLLIASAPSVDAQRKTK-DDIPLVSFQD--NAKR--     | ALQI |
| T-1 conotoxin LeDr243 Q3YEH0            | (1) | MRCLEFVILLLLLIASAPSVDAQRKTK-DDMPLASFND--NAKR--     | ILQI |
| T-1 conotoxin Mr5A P69764               | (1) | MRCLEFVILLLLLIASAPSVDAQRKTK-DDMPLASFHD--NAKR--     | ILQI |
| T-1 conotoxin Tx-D021 Q9BH21            | (1) | MRCLEFVILLLLLIASAPSVDAQRKTK-DDMSLASFHD--DAKR--     | ILQI |
| T-1 conotoxin Pn-014 Q9BH86             | (1) | MRCLEFVILLLLLIASAPSVDAQRKTK-DDIPLVSFQD--NAKR--     | ILQT |
| T-1 conotoxin TeAr193 Q3YEH2            | (1) | MRCLEFVILLLLLIASAPSVDAQPKTK-DDIPLQASFLD--NAKR--    | YLQV |

T-1 conotoxin Ca5.2 P0C667 (1) MRCVVFVILLGLIASAPSVDARFQTKDDA-LASFHD--SAKR--HLQR  
T-1 conotoxin Pu5.5 P0C640 (1) MRCVVFVILLVLLIASAPSVDARFQTKDDA-LASFRD--SIKR--HLQT  
T-1 conotoxin Vn-05 Q9BPF2 (1) MRCLFVFLVILLVLLSASAPSVDARPKNE--DDVSLASFHD--NAQR--TLQR  
T-1 conotoxin TeArl54 Q3YEE8 (1) MHCLEVFVILLLLLTASGLSVDARPKTE--DDVPLSFRD--NTKS--TLQR  
Consensus (1) MRCLFVVFVILLLLIASAPSVDA PKTK DDVPLASFHD NAKR L

51

77

T-1 conotoxin 3 Q3YEH7 (46) LSNK-RICCYPNVW--CCD-----  
T-1 conotoxin Gm5.1 Q9U6Z9 (46) LSNK-RLCCVTEDEW--CEEWW-----  
T-1 conotoxin Tx-D0111 Q9BPG7 (46) LSKK-QCWFYFDIS--CCITV-----  
T-1 conotoxin TxXIIIA Q9BPH1 (46) ---KTSDCCFYHNC--CC-----  
T-1 conotoxin Mr5.1a Q6PN86 (46) HRNK-R-CCPGWEL--CEEWDEW----  
T-1 conotoxin Mr5.1b Q6PN85 (46) LRNK-R-CCPGWEL--CEEWDDGW---  
T-1 conotoxin Mr5.2 Q6PN84 (46) LRDK-RFCRTQEV--CEEAIKNG---  
T-1 conotoxin Mr5.3 Q6PN83 (46) LRNK-R-CCITFES--CEEFDLK----  
T-1 conotoxin Mr5.4a Q6PN82 (46) LLNK-R-CCQVMPQ--CEEWN-----  
T-1 conotoxin Pn-B0151 Q9BPG0 (46) LSNK-RSCOPTILS--CCFV-----  
T-1 conotoxin Pu5.3 P0C638 (46) LRNT-RSCPEEP--CCFWR-----  
T-1 conotoxin Pu5.4 P0C639 (46) LRNT-RSCPEEIT--CCPWG-----  
T-1 conotoxin Pu5.1 P0C636 (46) LWKGR-RSCPSPTS--CCPWGKRK---  
T-1 conotoxin Pu5.2 P0C637 (48) LWNL-RGCCEDKT--CCFIG-----  
T-1 conotoxin Ts-011 Q9BH75 (48) LWNL-RGCCEDKT--CCFIG-----  
T-1 conotoxin Ca5.1 P0C666 (51) VSTALATCCKFQFLNFCNEK-----  
T-1 conotoxin Lp5.2 Q6PN80 (51) LNVAGSVCCKVDTS--CCSN-----  
T-superfamily conotoxin Lt5b ABC70191 (51) LNVAGSVCCKVDTS--CCSN-----  
T-superfamily conotoxin Lt5g ABC70194 (51) LNVAGSVCCKVDTS--CCSNQ-----  
T-superfamily conotoxin Lt5f ABC70192 (51) LNVAGSVCCKVDTS--CC-----  
T-superfamily conotoxin Lt5j ABC70199 (51) LNVAGSVCCKVDTS--CCSSQ-----  
T-superfamily conotoxin Lt5k ABC70198 (51) LNVADSVCCKVDTS--CCSN-----  
T-superfamily conotoxin Lt5i ABC70193 (45) -EVRKVYCCGLGVRDDWCCAGQIQI---  
T-1 conotoxin Im5.1 Q9U6Z5 (46) DWNS---CCGKNPG--CCPWGK-----  
T-1 conotoxin LeDr192 Q3YEH1 (46) RLNI-RECCEDGWC--CTAAPLTGR--  
T-1 conotoxin TxIX P81755 (46) RLNI-RECCEDGWC--CTAAPLTGR--  
T-1 conotoxin Pn-B02 Q9BPG8 (46) HLNI-RECCSDGWC--CPAG-----  
T-1 conotoxin Pu-0111 Q9BPF4 (46) LLDI-RMCCLGTSG--CCPWG-----  
T-2 conotoxin MrIA P58808 (46) LRN-GVCCGYKLC--HPC-----  
T-1 conotoxin Ca5.3 P0C668 (44) QEHWNKRCCPRRLA--CCIIGRK----  
T-1 conotoxin Pu5.6 P0C641 (41) QQHWNKRCCPRKIW--CCMIPR----  
T-1 conotoxin Leo-T1 P0C906 (44) QGLWDKRCCPNLFY--CCPDRK----  
T-1 conotoxin Gm5.2 Q9U6Z8 (43) LQTLRKKVCCRPVQ--DCCSGK-----  
T-1 conotoxin TeArl51 Q3YEE9 (43) LQTLRKKVCCRPMQ--DCCSGK-----  
T-1 conotoxin Tx5.1 Q9U700 (43) LQHNLQRCCQTFYW--CCVQGK-----  
T-1 conotoxin Leo-T2 P0C907 (46) ---K-RPCCPLIPG--CCR-----  
T-1 conotoxin TauMi Q6PTD0 (46) PWMT-RRCCPGNFA--CCGK-----  
T-1 conotoxin ViVA P0C2B0 (46) -----RQCCITPE--CCRIG-----  
T-1 conotoxin ViVB P0C2B1 (46) -----RQCCPTPE--CCRVG-----  
T-superfamily conotoxin Sr5.1 ACN22840 (46) R--IINWCCCLIFYQ--CC-----  
T-superfamily conotoxin Sr5.2 ACN22841 (31) R--IINWCCCLIFYQ--CC-----  
T-superfamily conotoxin Sr5.3 ACN22842 (46) R--IINWCCCLIFYQ--CC-----  
T-superfamily conotoxin Sr5.5ACN22844 (31) R--IINWCCCLTFYQ--CC-----  
T-superfamily conotoxin Sr5.6 ACN22845 (46) R--IMAGCCPRFYQ--CCYPG-----  
T-superfamily conotoxin Sr5.7 ACN22846 (46) R--IINWCCCLIFYQ--CCLRR-----  
T-superfamily conotoxin Sr5.8 ACN22847 (31) R--IMAGCCPRFYQ--CCYPG-----  
T-1 conotoxin LiC121 Q3YEG9 (46) LWIK-ALCCYGYRF--CCPNFR-----  
T-1 conotoxin LiC33 Q3YEH4 (46) LWIK-ALCCYGYRF--CCPIFGKG--  
T-1 conotoxin LiC32 Q3YEH5 (46) LWQN-TWCCRDHLR--CCG-----  
T-1 conotoxin Ts-03 Q9BPF6 (45) HWAK-SLCCPEDAW--CC-----  
T-1 conotoxin Vi5.1a P0C669 (46) LWNQ-RHCCPIDLP--CCPPG-----  
T-1 conotoxin Vi5.1b P0C670 (46) LWNQ-SHCCPIDLQ--CCPPG-----  
T-1 conotoxin Lp5.1 Q6PN81 (46) LWNK-RSCCPQEFL--CCLYLVK----  
T-superfamily conotoxin Lt5a ABC70187 (46) LWNK-RSCCPQEFL--CCLYLVK----  
T-superfamily conotoxin Lt5c ABC70188 (46) FWNK-RDCCPAKMF--CCQW-----  
T-superfamily conotoxin Lt5d ABC70189 (46) FWNK-RDCCPAKLL--CCNP-----  
T-superfamily conotoxin Lt5e ABC70190 (46) LWNK-RSCCPREFL--CCLR-----  
T-superfamily conotoxin Lt5d-1 ABC70196 (46) FWNK-RDCCPSKLL--CCNP-----  
T-superfamily conotoxin Lt5d-2 ABC70197 (46) FWNK-RDCCPANLL--CCNP-----  
T-1 conotoxin p5a Q9U6Z6 (46) FWKK-RGCCPKQMR--CCTLG-----  
T-1 conotoxin BeB34 Q3YEH6 (46) LRNK-RACCPYEPS--CCI-----  
T-1 conotoxin Pn-B01121 Q9BPF3 (46) LSNK-RYCCVYDYS--CCLSWG-----  
T-1 conotoxin Pu-B01122 Q9BPF1 (46) LSNK-RYCCYFDYS--CCLYLR-----  
T-1 conotoxin LeDr243 Q3YEH0 (46) LSRK-PCCSIHDNS--CCGLG-----  
T-1 conotoxin Mr5A P69764 (46) LQDR-NACCIVRQC--C-----



```

T-1 conotoxin Tx-D021 Q9BH21 (46) LQDR-SGCCVIDSN--CCG-----
T-1 conotoxin Pn-014 Q9BH86 (46) FESR-YDCCKTFEC--CHWG-----
T-1 conotoxin TeAr193 Q3YEH2 (46) LESK-RNCCRRQIC--CGRTK-----
T-1 conotoxin Ca5.2 P0C667 (45) LVNA-RKCCPESPP--CHYFGRRK--
T-1 conotoxin Pu5.5 P0C640 (45) LLDA-RECCPQSPP--CHYYYYGSWK
T-1 conotoxin Vn-05 Q9BPF2 (46) LLNK-RSCCPNNPA--CH-----
T-1 conotoxin TeAr154 Q3YEE8 (46) LLKR-VNCCPIDES--CCS-----
Consensus (51) L R CC CC

```

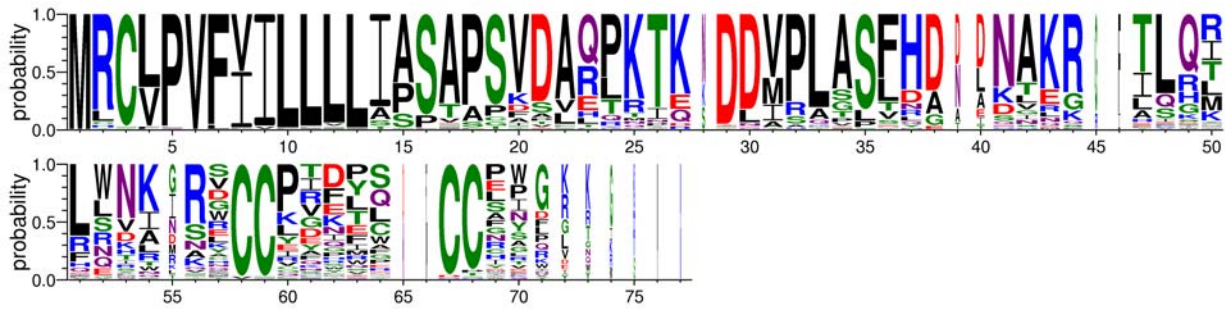

The leader peptides of this large family contain a highly conserved Asp at position 29 and relatively well conserved Pro, Leu, and Ser at positions 32, 33, and 35, respectively.



*j. P-Superfamily*

```

|-----signal-----|---leader peptide---|
1 50
P-superfamily conotoxin Lt9a ABC74994 (1) --MTLTKSAVLIIVLLLAFDNFADVQPLIT--MGGR-LSNLLSKRVRI
P-superfamily conotoxin Lt9a var ABC74995 (1) --MTLTKSAVLIIVLLLAFDNFADVQPLIT--MGGR-LSNLLSKRVSI
P-superfamily conotoxin Lt9a var ABC74996 (1) --MTLTKSAVLIIVLLLAFDNFADVQPLIT--MGGR-LSNLLSKRVSI
P-superfamily conotoxin Gm9.1 Q9GU57 (1) MHLSLARSAVLMILLFALGNFVVQSGQITRDV DNGQ-LTDNRNLQTE
P-superfamily conotoxin Rg9.1 Q8I6V7 (1) MHLSLARSAVLIIVLLFALGNFVGVQSGQITRDADHGINLSLRKQMSRS
Spasmodic peptide Tx9a Q9GU58 (1) MHLSLARSAVLMILLFALGNFVVQSGQITRDV DNGQ-LTDNRNLQSK
Consensus (1) MHLSLTKSAVLIIVLLLLALGNFVVDVQPLITRDMGGGR LSNLRSKRVSII

51 90
P-superfamily conotoxin Lt9a ABC74994 (46) WFCASRTCSAPADCNFCCTCESGVCVDWL-----
P-superfamily conotoxin Lt9a var ABC74995 (46) WFCASRTCSAPADCNFCCTCESGVCVDWL-----
P-superfamily conotoxin Lt9a var ABC74996 (46) WFCASRTCSAPADCNFCCTCESGVCVDWL-----
P-superfamily conotoxin Gm9.1 Q9GU57 (50) WNPFLFMRRRCNNSQSHSDCASHCTCFRGGGAVNG-
P-superfamily conotoxin Rg9.1 Q8I6V7 (51) PLVKGAFCCQACSSVKCPKKCFCHPEKVCYREMRTKERD
Spasmodic peptide Tx9a Q9GU58 (50) WKPVSLYMRRCNNSQSHSDCASHCTCFRGGGAVNG-
Consensus (51) WFCASRTCSAPADCNFCCTCESGVCVDWL FR

```

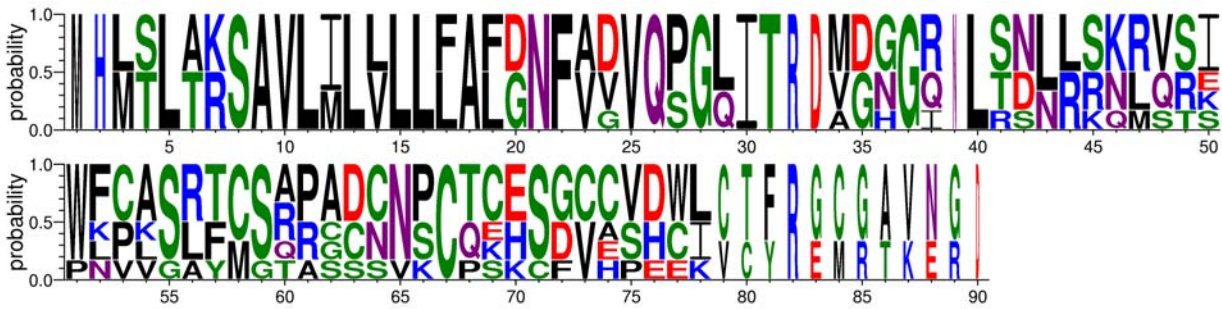

This presently small family (in terms of full sequence information) has highly conserved leader peptides including a conserved IleThrArgAsp motif and a conserved Leu at position 40.

### k. I-Superfamily

|                                 |        | -----leader peptide----- |                                                     |
|---------------------------------|--------|--------------------------|-----------------------------------------------------|
|                                 |        | 1                        | 50                                                  |
| I2-superfamily conotoxin 1      | P69500 | (1)                      | MMFRLTSVSCFLLVIAACLNLFQVLTTRC FPPGIYCTP             |
| I2-superfamily conotoxin 2      | P69501 | (1)                      | MMFRLTSVSCFLLVIAACLNLFQVLTTRC FPPGIYCTP             |
| I2-superfamily conotoxin ViTx   | Q7YZS9 | (1)                      | MMFRLTSVSCFLLVIAACLNLFQVLTTRC FPPGIYCTP             |
| I2-superfamily conotoxin        | P69494 | (1)                      | MMFRLTSVSCFLLVIAACLNLFQVLTTRC FPPGIYCTP             |
| I2-superfamily conotoxin        | P69498 | (1)                      | MMFRLTSVSCFLLVIAACLNLFQVLTTRC FPPGIYCTP             |
| I2-superfamily conotoxin        | P69499 | (1)                      | MMFRLTSVSCFLLVIAACLNLFQVLTTRC FPPGIYCTP             |
| I2-superfamily conotoxin 1      | P69495 | (1)                      | MMFRLTSVSCFLLVIAACLNLFQVLTTRC FPPGIYCTP             |
| I2-superfamily conotoxin 2      | P69496 | (1)                      | MMFRLTSVSCFLLVIAACLNLFQVLTTRC FPPGIYCTP             |
| I2-superfamily conotoxin 3      | P69497 | (1)                      | MMFRLTSVSCFLLVIAACLNLFQVLTTRC FPPGIYCTP             |
| I1-superfamily conotoxin R11.2  | Q7Z099 | (1)                      | MMFRLTSVSCFLLVIAACLNLFQVLTTRC FPPGIYCTP             |
| I1-superfamily conotoxin R11.5  | Q7Z098 | (1)                      | MMFRLTSVSCFLLVIAACLNLFQVLTTRC FPPGIYCTP             |
| I1-superfamily conotoxin R11.11 | Q7Z0A0 | (1)                      | MMFRLTSVSCFLLVIAACLNLFQVLTTRC FPPGIYCTP             |
| I1-superfamily conotoxin R11.12 | Q7Z0A4 | (1)                      | MMFRLTSVSCFLLVIAACLNLFQVLTTRC FPPGIYCTP             |
| I1-superfamily conotoxin R11.13 | Q7Z0A3 | (1)                      | MMFRLTSVSCFLLVIAACLNLFQVLTTRC FPPGIYCTP             |
| I1-superfamily conotoxin R11.18 | Q7Z097 | (1)                      | MMFRLTSVSCFLLVIAACLNLFQVLTTRC FPPGIYCTP             |
| I1-superfamily conotoxin R11c   | Q7Z096 | (1)                      | MKLCLTFLLVLMILASVTGEKSSKHTLSRAARVKNRGPSPFKAKDEPKYKY |
| I1-superfamily conotoxin R11.3  | Q7Z090 | (1)                      | MKLCLTFLLVLMILASVTGEKLSQTLRRAAR--KNKGPRCQVWGRVHCTY  |
| I1-superfamily conotoxin Ar11a  | P0C607 | (1)                      | MKLCLTFLLVLMILASVTGEKSS--ERSLSGAILRGRRTSRRCHRRIR    |
| Consensus                       |        | (1)                      | MM RLTSVSC LLVIA LN V LT C DG C                     |

|                                 |        | recognition sequence |                                      |
|---------------------------------|--------|----------------------|--------------------------------------|
|                                 |        | 51                   | 84                                   |
| I2-superfamily conotoxin 1      | P69500 | (39)                 | WLPCCWGICCD-TCCNVCHLRI--GKRATFQE--   |
| I2-superfamily conotoxin 2      | P69501 | (39)                 | WLPCCWGICCD-TCCNVCHLRF--GKRATFQE--   |
| I2-superfamily conotoxin ViTx   | Q7YZS9 | (39)                 | WLPCCWGICCG-TCCNVCHLRI--GKRATFQE--   |
| I2-superfamily conotoxin        | P69494 | (39)                 | HLPCCRGRCCSGWCFRCFPRY--GKRATFQ---    |
| I2-superfamily conotoxin        | P69498 | (39)                 | WLPCCSGRCCSGWCFTRCSPRY--GKRATFQE--   |
| I2-superfamily conotoxin        | P69499 | (39)                 | HRPCCRGTCGSGLCREMCNLWY--GKRATFQE--   |
| I2-superfamily conotoxin 1      | P69495 | (37)                 | DSNCCKNVCCWNVCESHCGHH--GKRATFQ---    |
| I2-superfamily conotoxin 2      | P69496 | (37)                 | SYQCCCHKSCCIRECFPCRWD--GKRATFQ---    |
| I2-superfamily conotoxin 3      | P69497 | (37)                 | DSQCCRYSCCWGYCDLTLIN--GKRATFQ---     |
| I1-superfamily conotoxin R11.2  | Q7Z099 | (15)                 | HADCCNCCPIG-TCAFSTNWILPGCSTGPFMTR-   |
| I1-superfamily conotoxin R11.5  | Q7Z098 | (15)                 | HADCCNCCPIG-TCAFSTNWILPGCSTGPFMTR-   |
| I1-superfamily conotoxin R11.11 | Q7Z0A0 | (15)                 | HADCCNCCCLGG-ICKPSTSWIG--CSTNVFLTR-  |
| I1-superfamily conotoxin R11.12 | Q7Z0A4 | (15)                 | HADCCNCCCLSG-ICKPSTSWTG--CSTSTFLLTR- |
| I1-superfamily conotoxin R11.13 | Q7Z0A3 | (15)                 | HADCCNCCCLSG-ICKPSTSWTG--CSTSTFLLTR- |
| I1-superfamily conotoxin R11.18 | Q7Z097 | (15)                 | HADCCNCCPFG-TCAFSTNRILPGCSTGPFMTR-   |
| I1-superfamily conotoxin R11c   | Q7Z096 | (51)                 | HADCCNCCCLGG-ICKPSTSWIG--CSTNVFLTR-  |
| I1-superfamily conotoxin R11.3  | Q7Z090 | (49)                 | HKDCCPSVCCF--KGRCKPQSWGCWSEPT----    |
| I1-superfamily conotoxin Ar11a  | P0C607 | (49)                 | DSQCCGGMCCQ--GNRCFVAIRRCFHLPF----    |
| Consensus                       |        | (51)                 | HADCC CC CKP C GKRATFQ               |

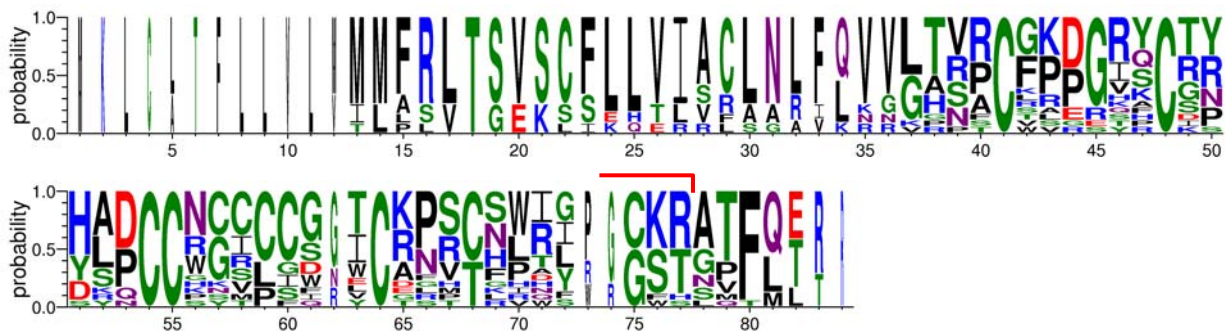

The red line shows the XG-(K/R)<sub>n</sub> motif for amidation after residue X in some family members (see the alignment of the I2-superfamily members above).

## References for Supplementary Information

1. Morris, R. P. et al. Ribosomally Synthesized Thiopeptide Antibiotics Targeting Elongation Factor Tu. *J. Am. Chem. Soc.*, 5946-5955 (2009).
2. Maqueda, M. et al. Genetic features of circular bacteriocins produced by Gram-positive bacteria. *FEMS Microbiol. Rev.* **32**, 2-22 (2008).
3. Duquesne, S., Destoumieux-Garzon, D., Peduzzi, J. & Rebuffat, S. Microcins, gene-encoded antibacterial peptides from enterobacteria. *Nat. Prod. Rep.* **24**, 708-34 (2007).
4. Roy, R. S., Allen, O. & Walsh, C. T. Expressed protein ligation to probe regiospecificity of heterocyclization in the peptide antibiotic microcin B17. *Chem. Biol.* **6**, 789-99 (1999).
5. Buczek, O., Bulaj, G. & Olivera, B. M. Conotoxins and the posttranslational modification of secreted gene products. *Cell Mol. Life Sci.* **62**, 3067-79 (2005).
6. de Vos, W. M., Jung, G. & Sahl, H.-G. in *Nisin and Novel Lantibiotics* (eds. Jung, G. & Sahl, H.-G.) 457-464 (ESCOM, Leiden, 1991).
7. Cotter, P. D., Hill, C. & Ross, R. P. Bacterial lantibiotics: strategies to improve therapeutic potential. *Curr. Protein Pept. Sci.* **6**, 61-75 (2005).
8. Chatterjee, C., Paul, M., Xie, L. & van der Donk, W. A. Biosynthesis and Mode of Action of Lantibiotics. *Chem. Rev.* **105**, 633-684 (2005).
9. Willey, J. M. & van der Donk, W. A. Lantibiotics: Peptides of Diverse Structure and Function. *Annu. Rev. Microbiol.* **61**, 477-501 (2007).
10. Li, Y. M., Milne, J. C., Madison, L. L., Kolter, R. & Walsh, C. T. From peptide precursors to oxazole and thiazole-containing peptide antibiotics: microcin B17 synthase. *Science* **274**, 1188-93 (1996).
11. Mitchell, D. A. et al. Structural and functional dissection of the heterocyclic peptide cytotoxin streptolysin S. *J. Biol. Chem.* **284**, 13004-12 (2009).
12. Liao, R. et al. Thiopeptide biosynthesis featuring ribosomally synthesized precursor peptides and conserved posttranslational modifications. *Chem. Biol.* **16**, 141-7 (2009).
13. Jennings, C., West, J., Waine, C., Craik, D. & Anderson, M. Biosynthesis and insecticidal properties of plant cyclotides: the cyclic knotted proteins from *Oldenlandia affinis*. *Proc. Natl. Acad. Sci. U.S.A.* **98**, 10614-9 (2001).
14. Ziemert, N., Ishida, K., Liaimer, A., Hertweck, C. & Dittmann, E. Ribosomal synthesis of tricyclic depsipeptides in bloom-forming cyanobacteria. *Angew. Chem., Int. Ed. Engl.* **47**, 7756-9 (2008).
15. Philmus, B., Christiansen, G., Yoshida, W. Y. & Hemscheidt, T. K. Post-translational modification in microviridin biosynthesis. *ChemBioChem* **9**, 3066-73 (2008).
16. Schneider, T. D. & Stephens, R. M. Sequence logos: a new way to display consensus sequences. *Nucleic Acids Res.* **18**, 6097-100 (1990).
17. Crooks, G. E., Hon, G., Chandonia, J. M. & Brenner, S. E. WebLogo: a sequence logo generator. *Genome Res.* **14**, 1188-90 (2004).
18. Duquesne, S. et al. Two Enzymes Catalyze the Maturation of a Lasso Peptide in *Escherichia coli*. *Chem. Biol.* **14**, 793-803 (2007).
